# Supplementary material
Source: PubMed Central journal article supplement (PMC9563103)

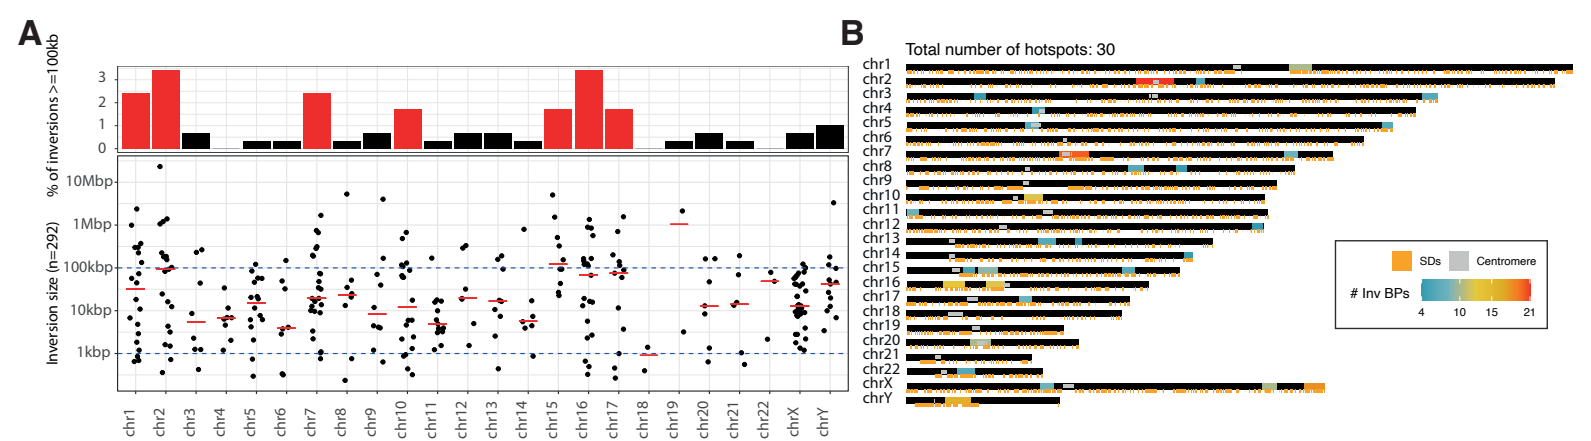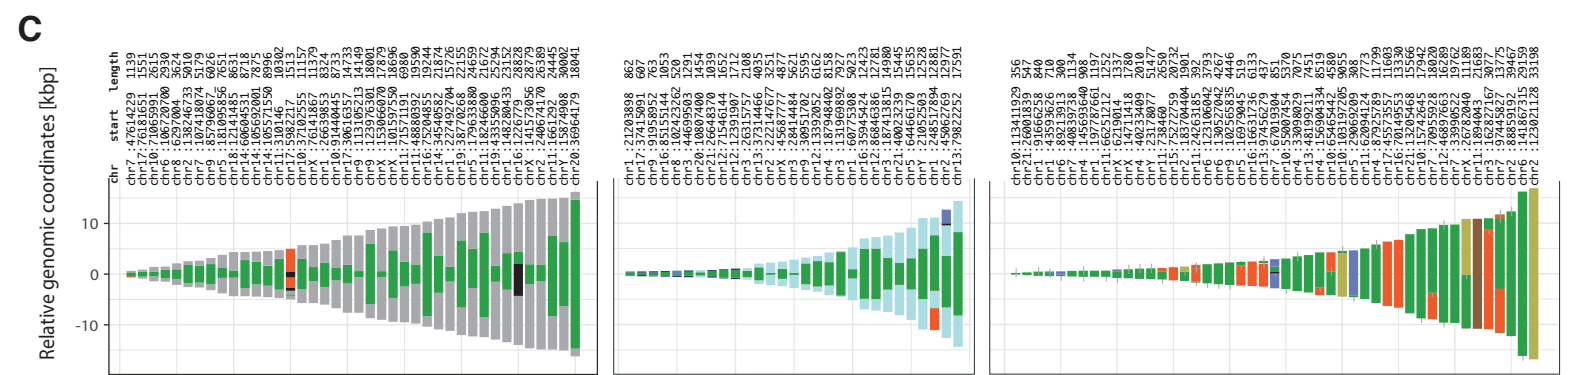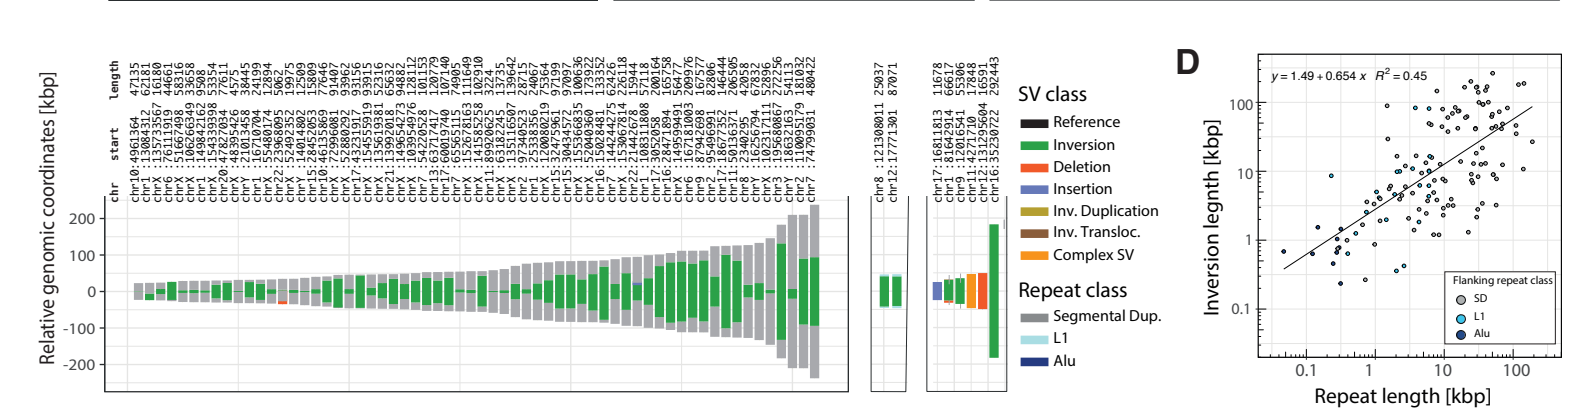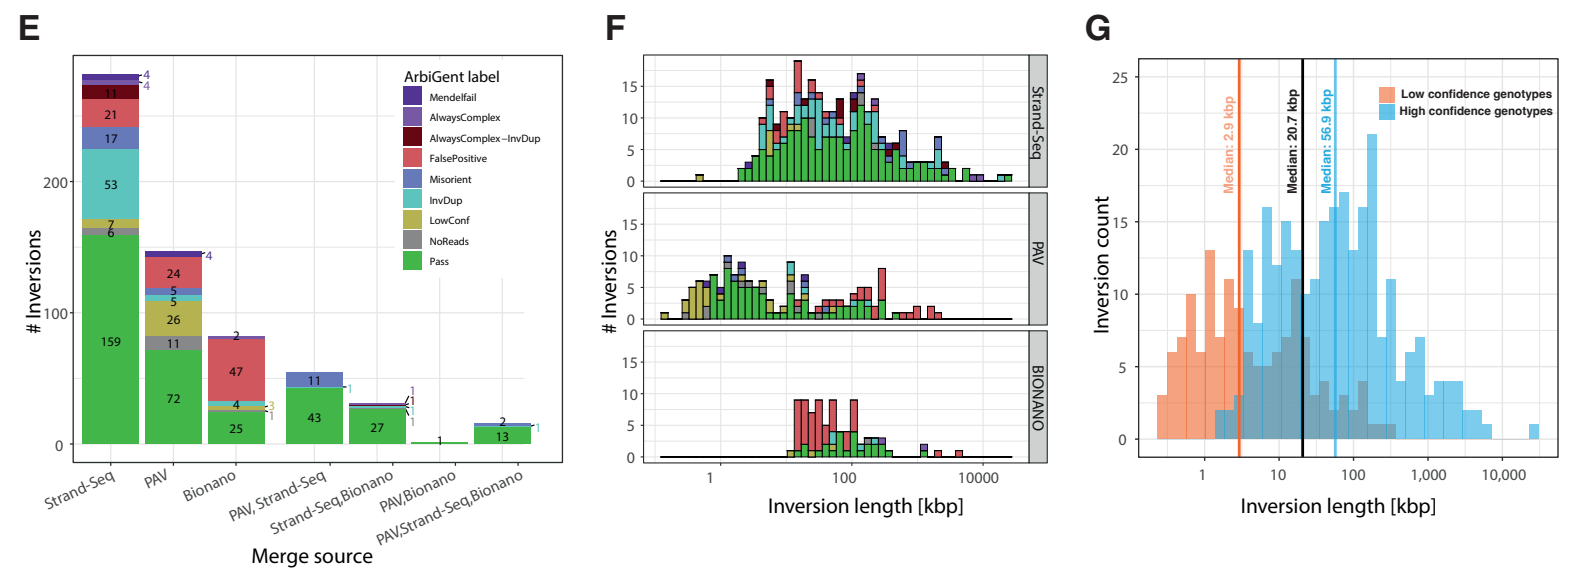

Supplement: NIHMS1803457-supplement-3.pdf [file NIHMS1803457-supplement-3.pdf]

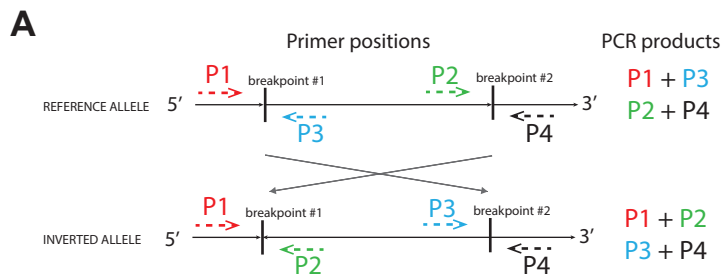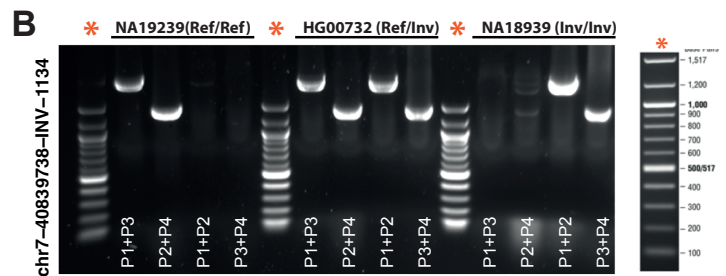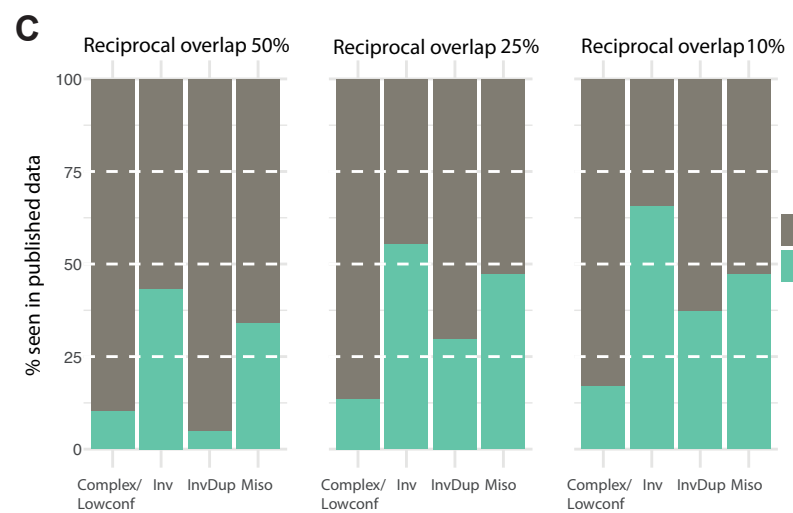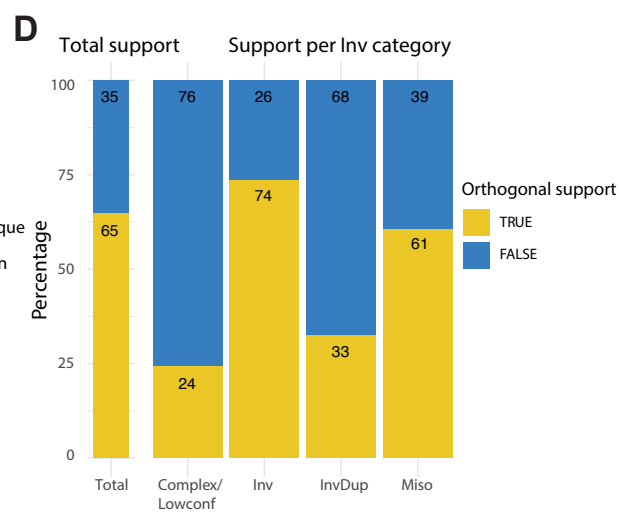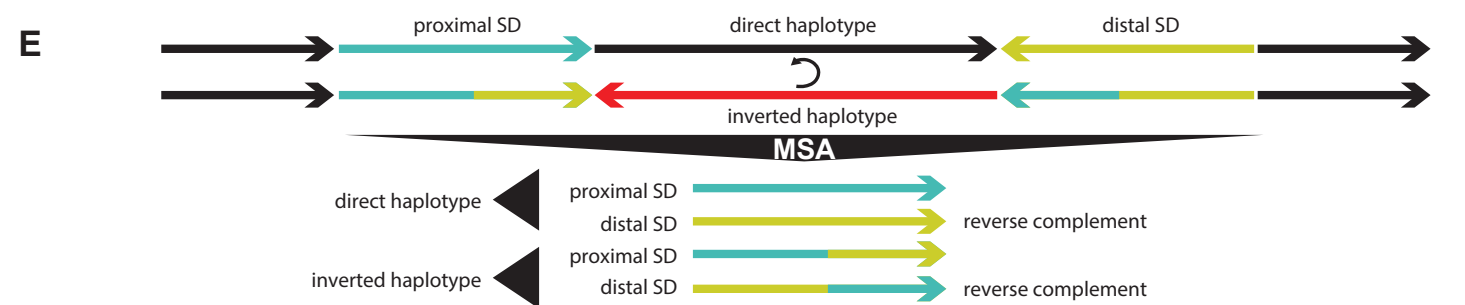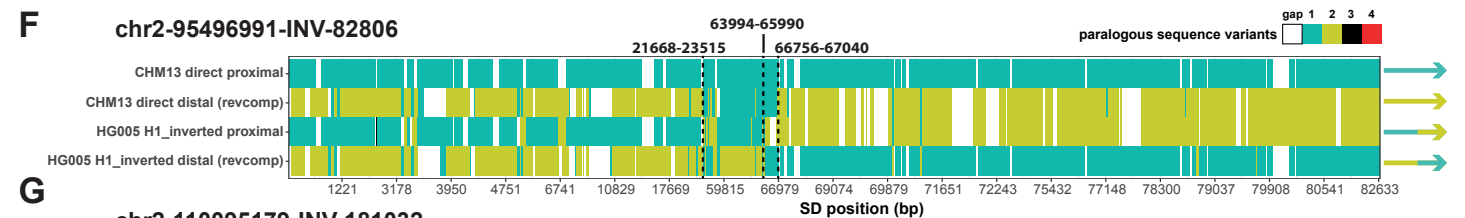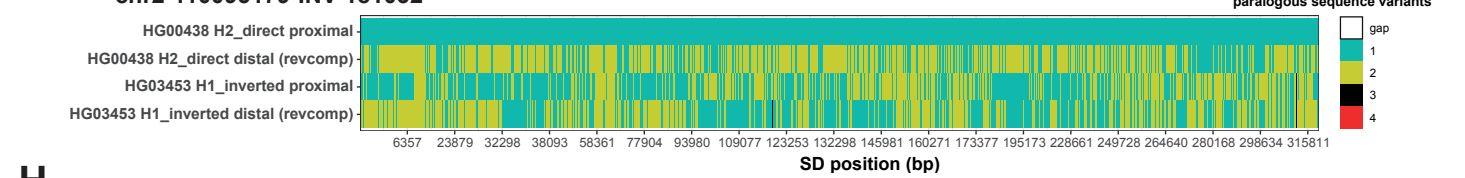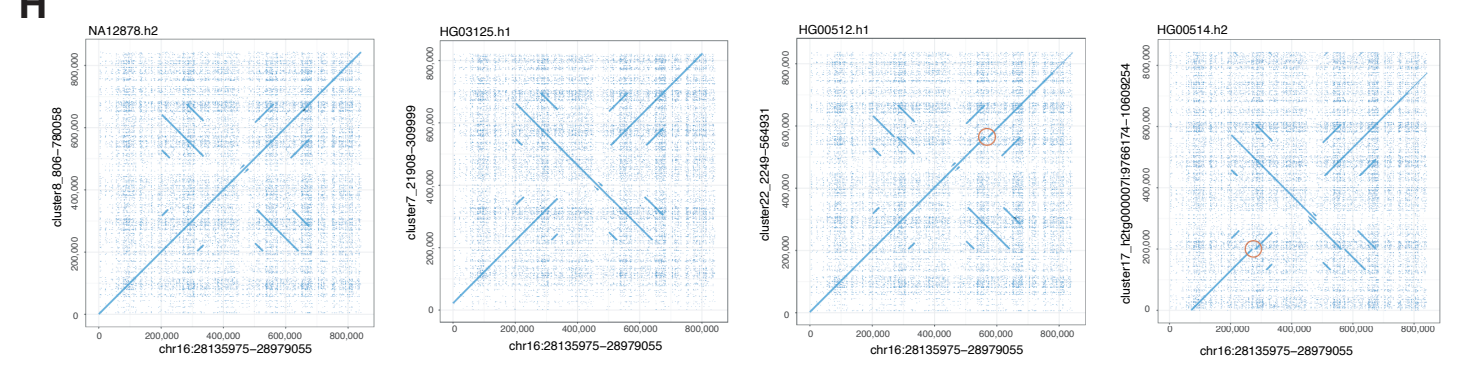

Supplement: NIHMS1803457-supplement-4.pdf [file NIHMS1803457-supplement-4.pdf]

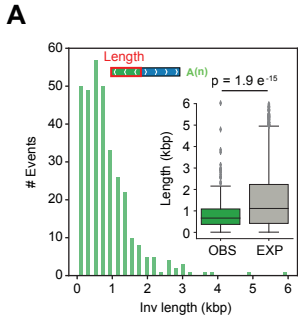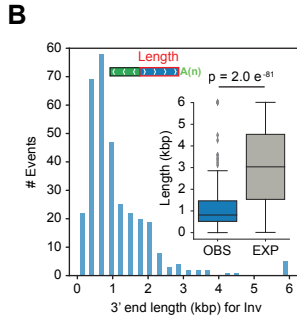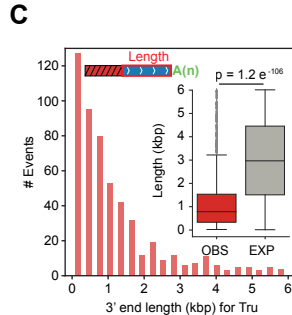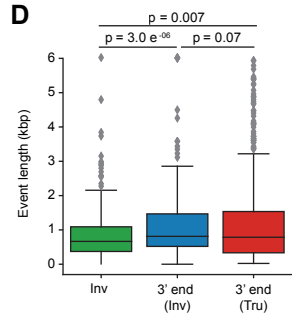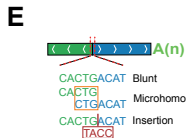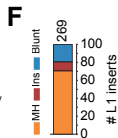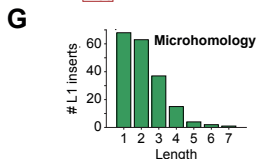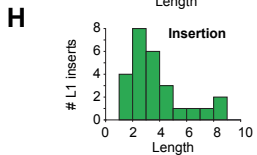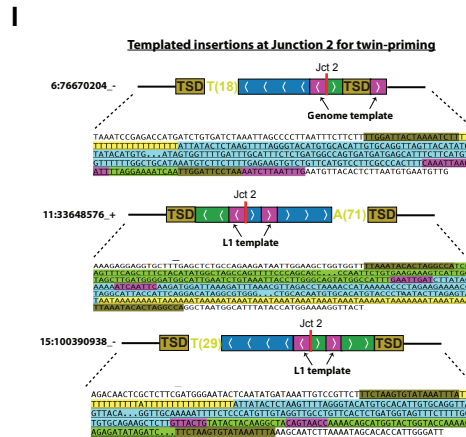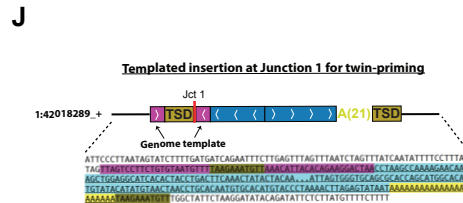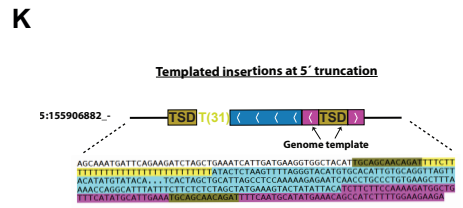

Supplement: NIHMS1803457-supplement-5.pdf [file NIHMS1803457-supplement-5.pdf]

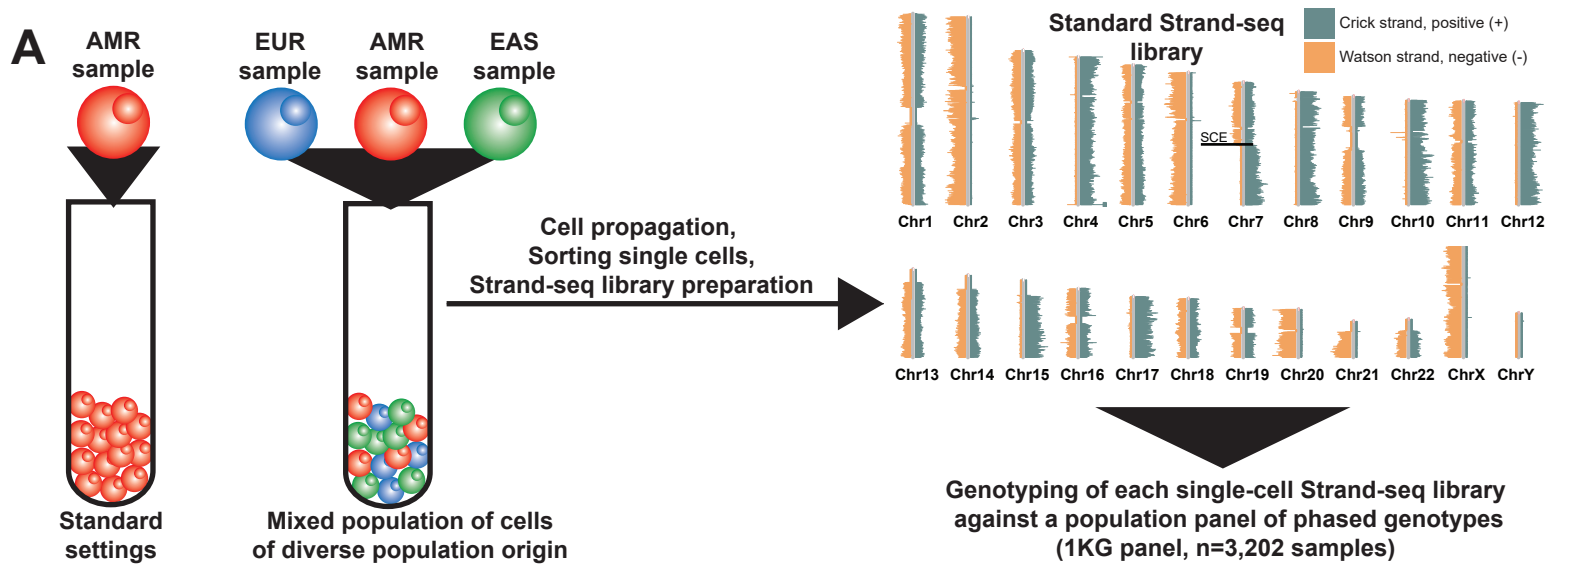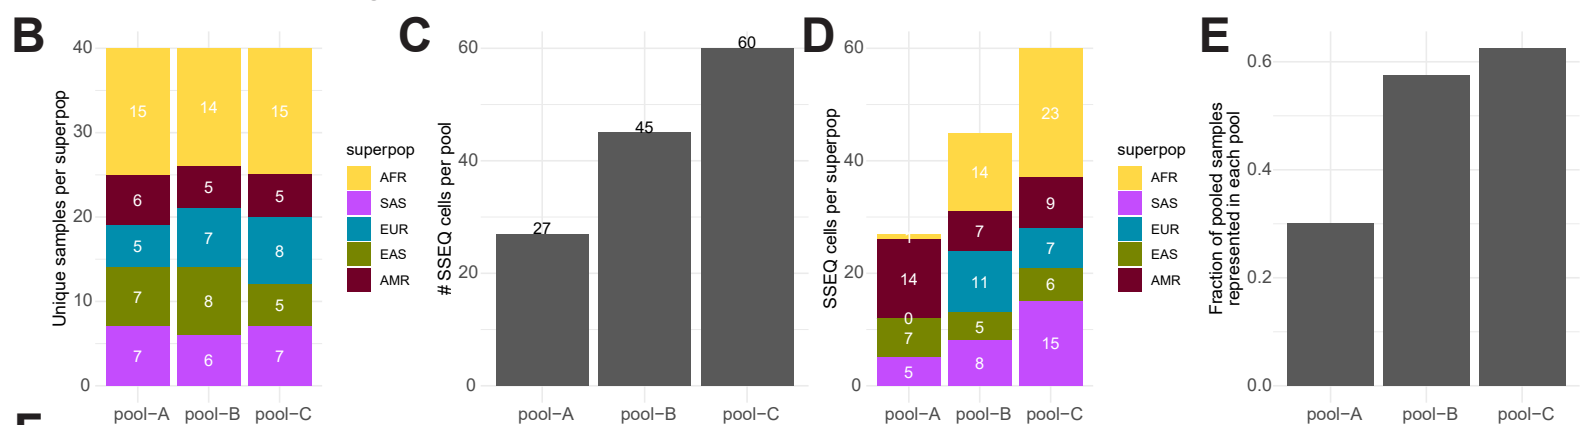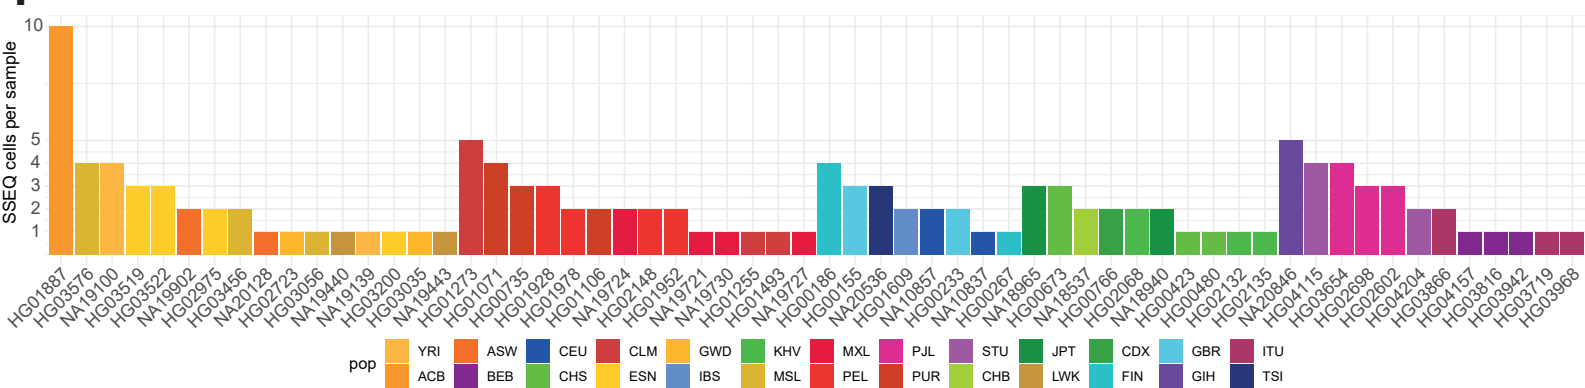

**G**

1 cell

|     | 0/0 | 0/1 | 1/1 |
|-----|-----|-----|-----|
|     | 0/0 | 0/1 | 1/1 |
| 0/0 | 225 | 9   | 0   |
| 0/1 | 0   | 19  | 0   |
| 1/1 | 0   | 6   | 43  |

2 cells

|     | 0/0 | 0/1 | 1/1 |
|-----|-----|-----|-----|
|     | 0/0 | 0/1 | 1/1 |
| 0/0 | 346 | 3   | 6   |
| 0/1 | 0   | 20  | 0   |
| 1/1 | 5   | 5   | 71  |

3 cells

|     | 0/0 | 0/1 | 1/1 |
|-----|-----|-----|-----|
|     | 0/0 | 0/1 | 1/1 |
| 0/0 | 397 | 0   | 0   |
| 0/1 | 0   | 25  | 0   |
| 1/1 | 7   | 3   | 69  |

12 cells

|     | 0/0 | 0/1 | 1/1 |
|-----|-----|-----|-----|
|     | 0/0 | 0/1 | 1/1 |
| 0/0 | 440 | 0   | 0   |
| 0/1 | 0   | 30  | 0   |
| 1/1 | 0   | 3   | 94  |

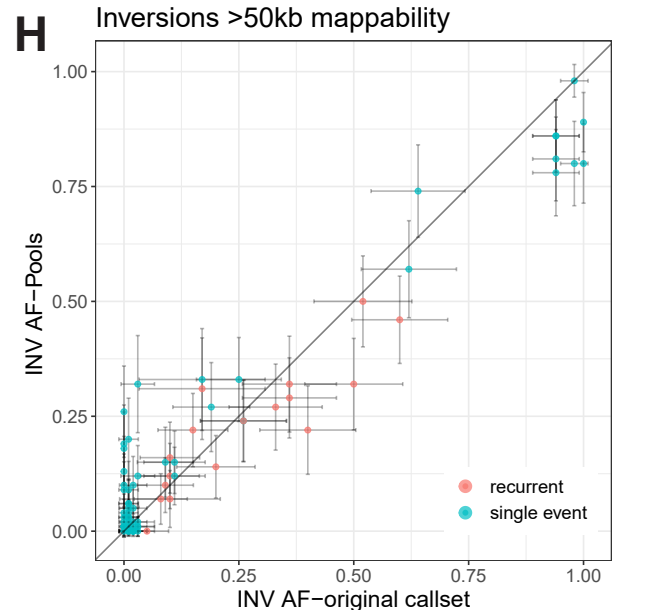

Supplement: NIHMS1803457-supplement-6.pdf [file NIHMS1803457-supplement-6.pdf]

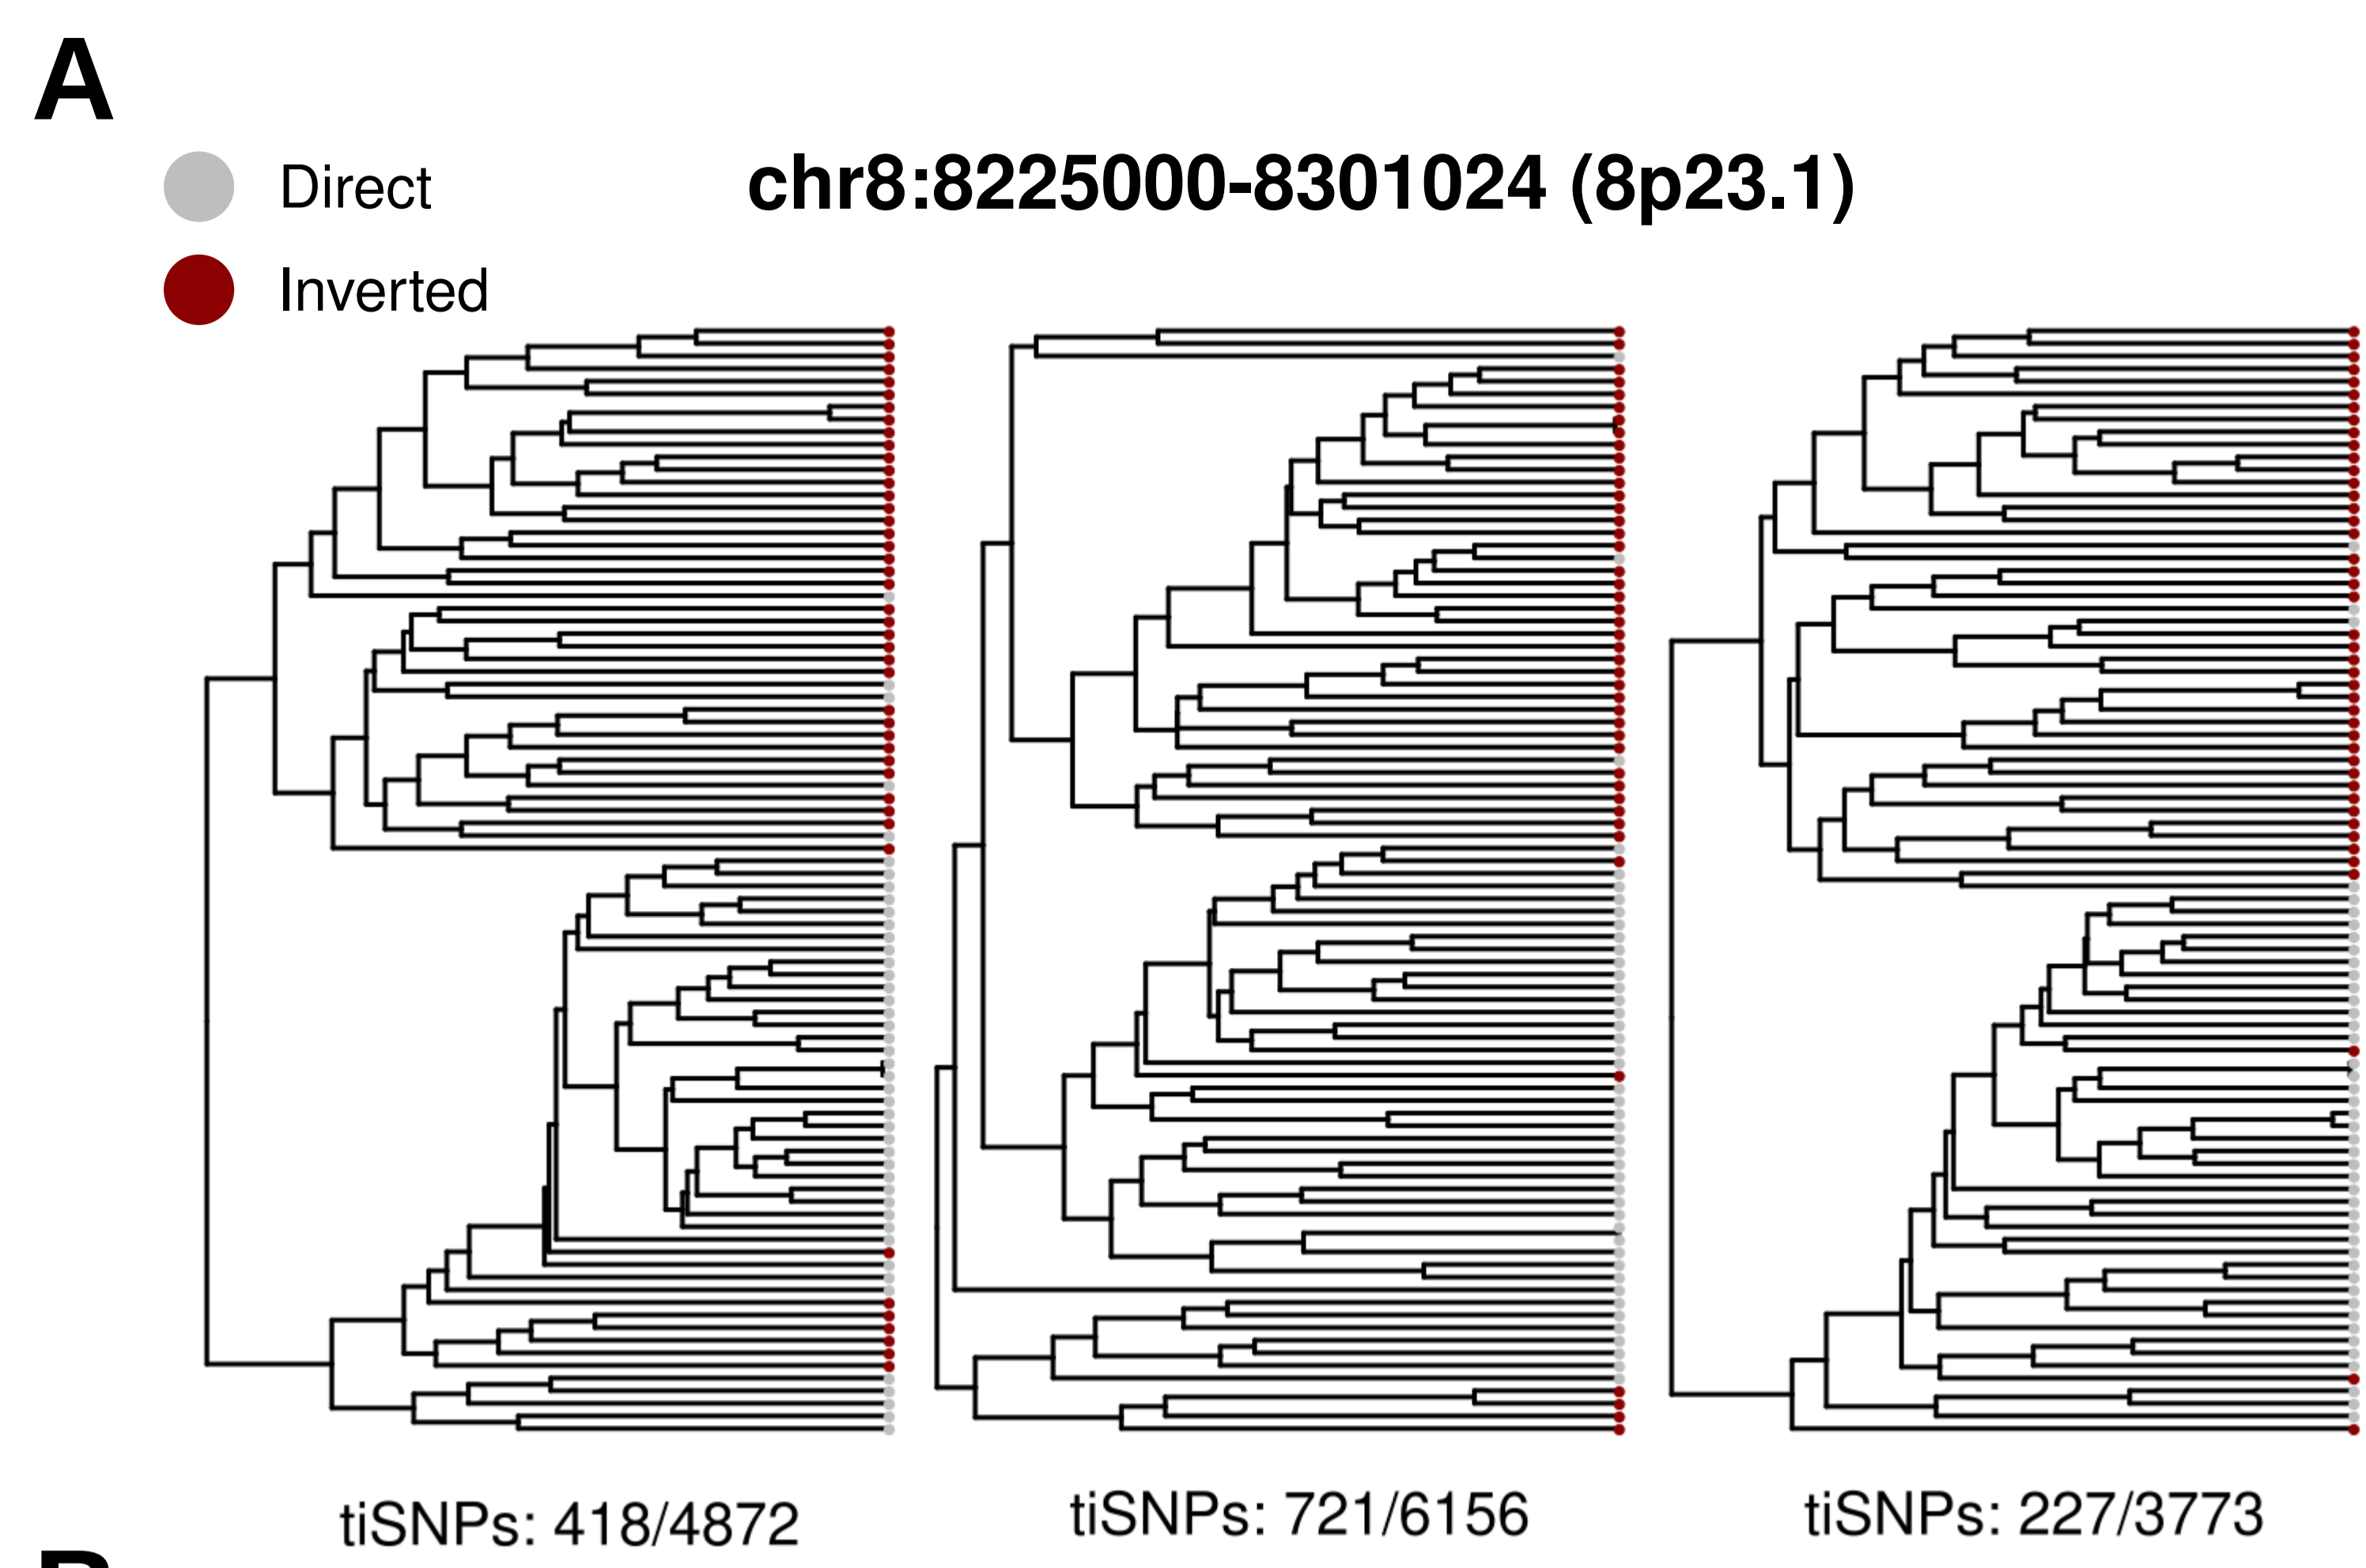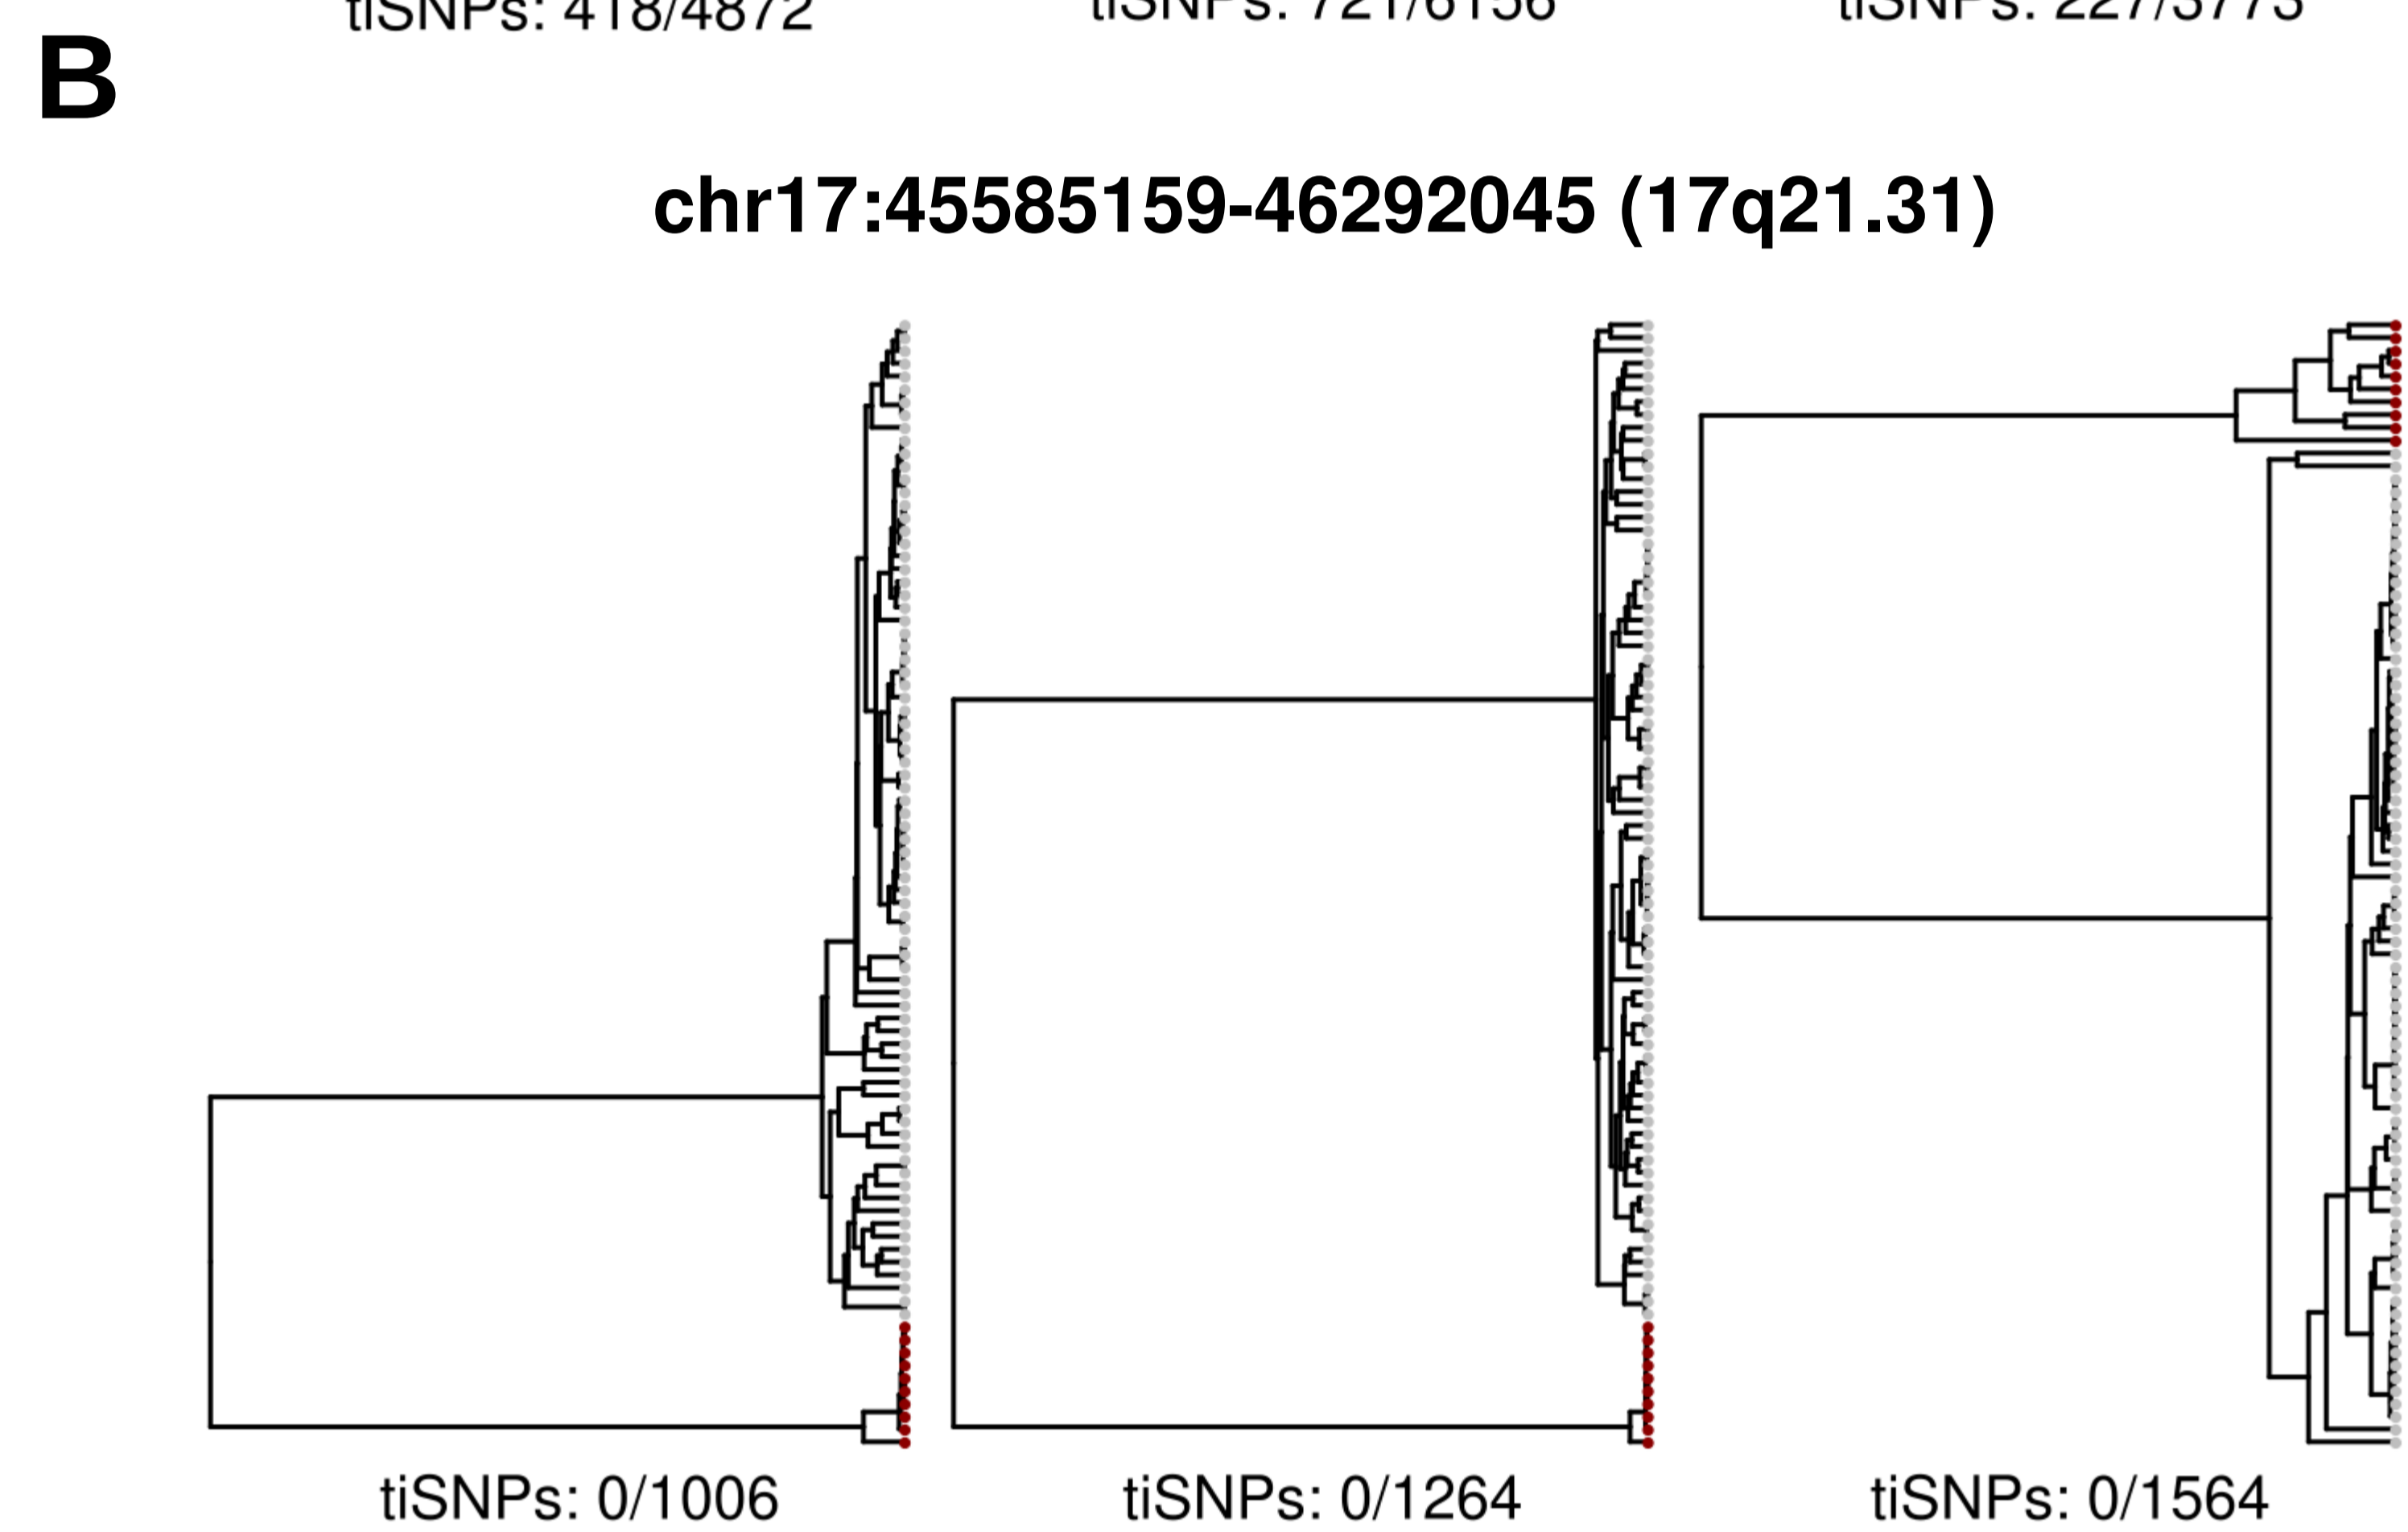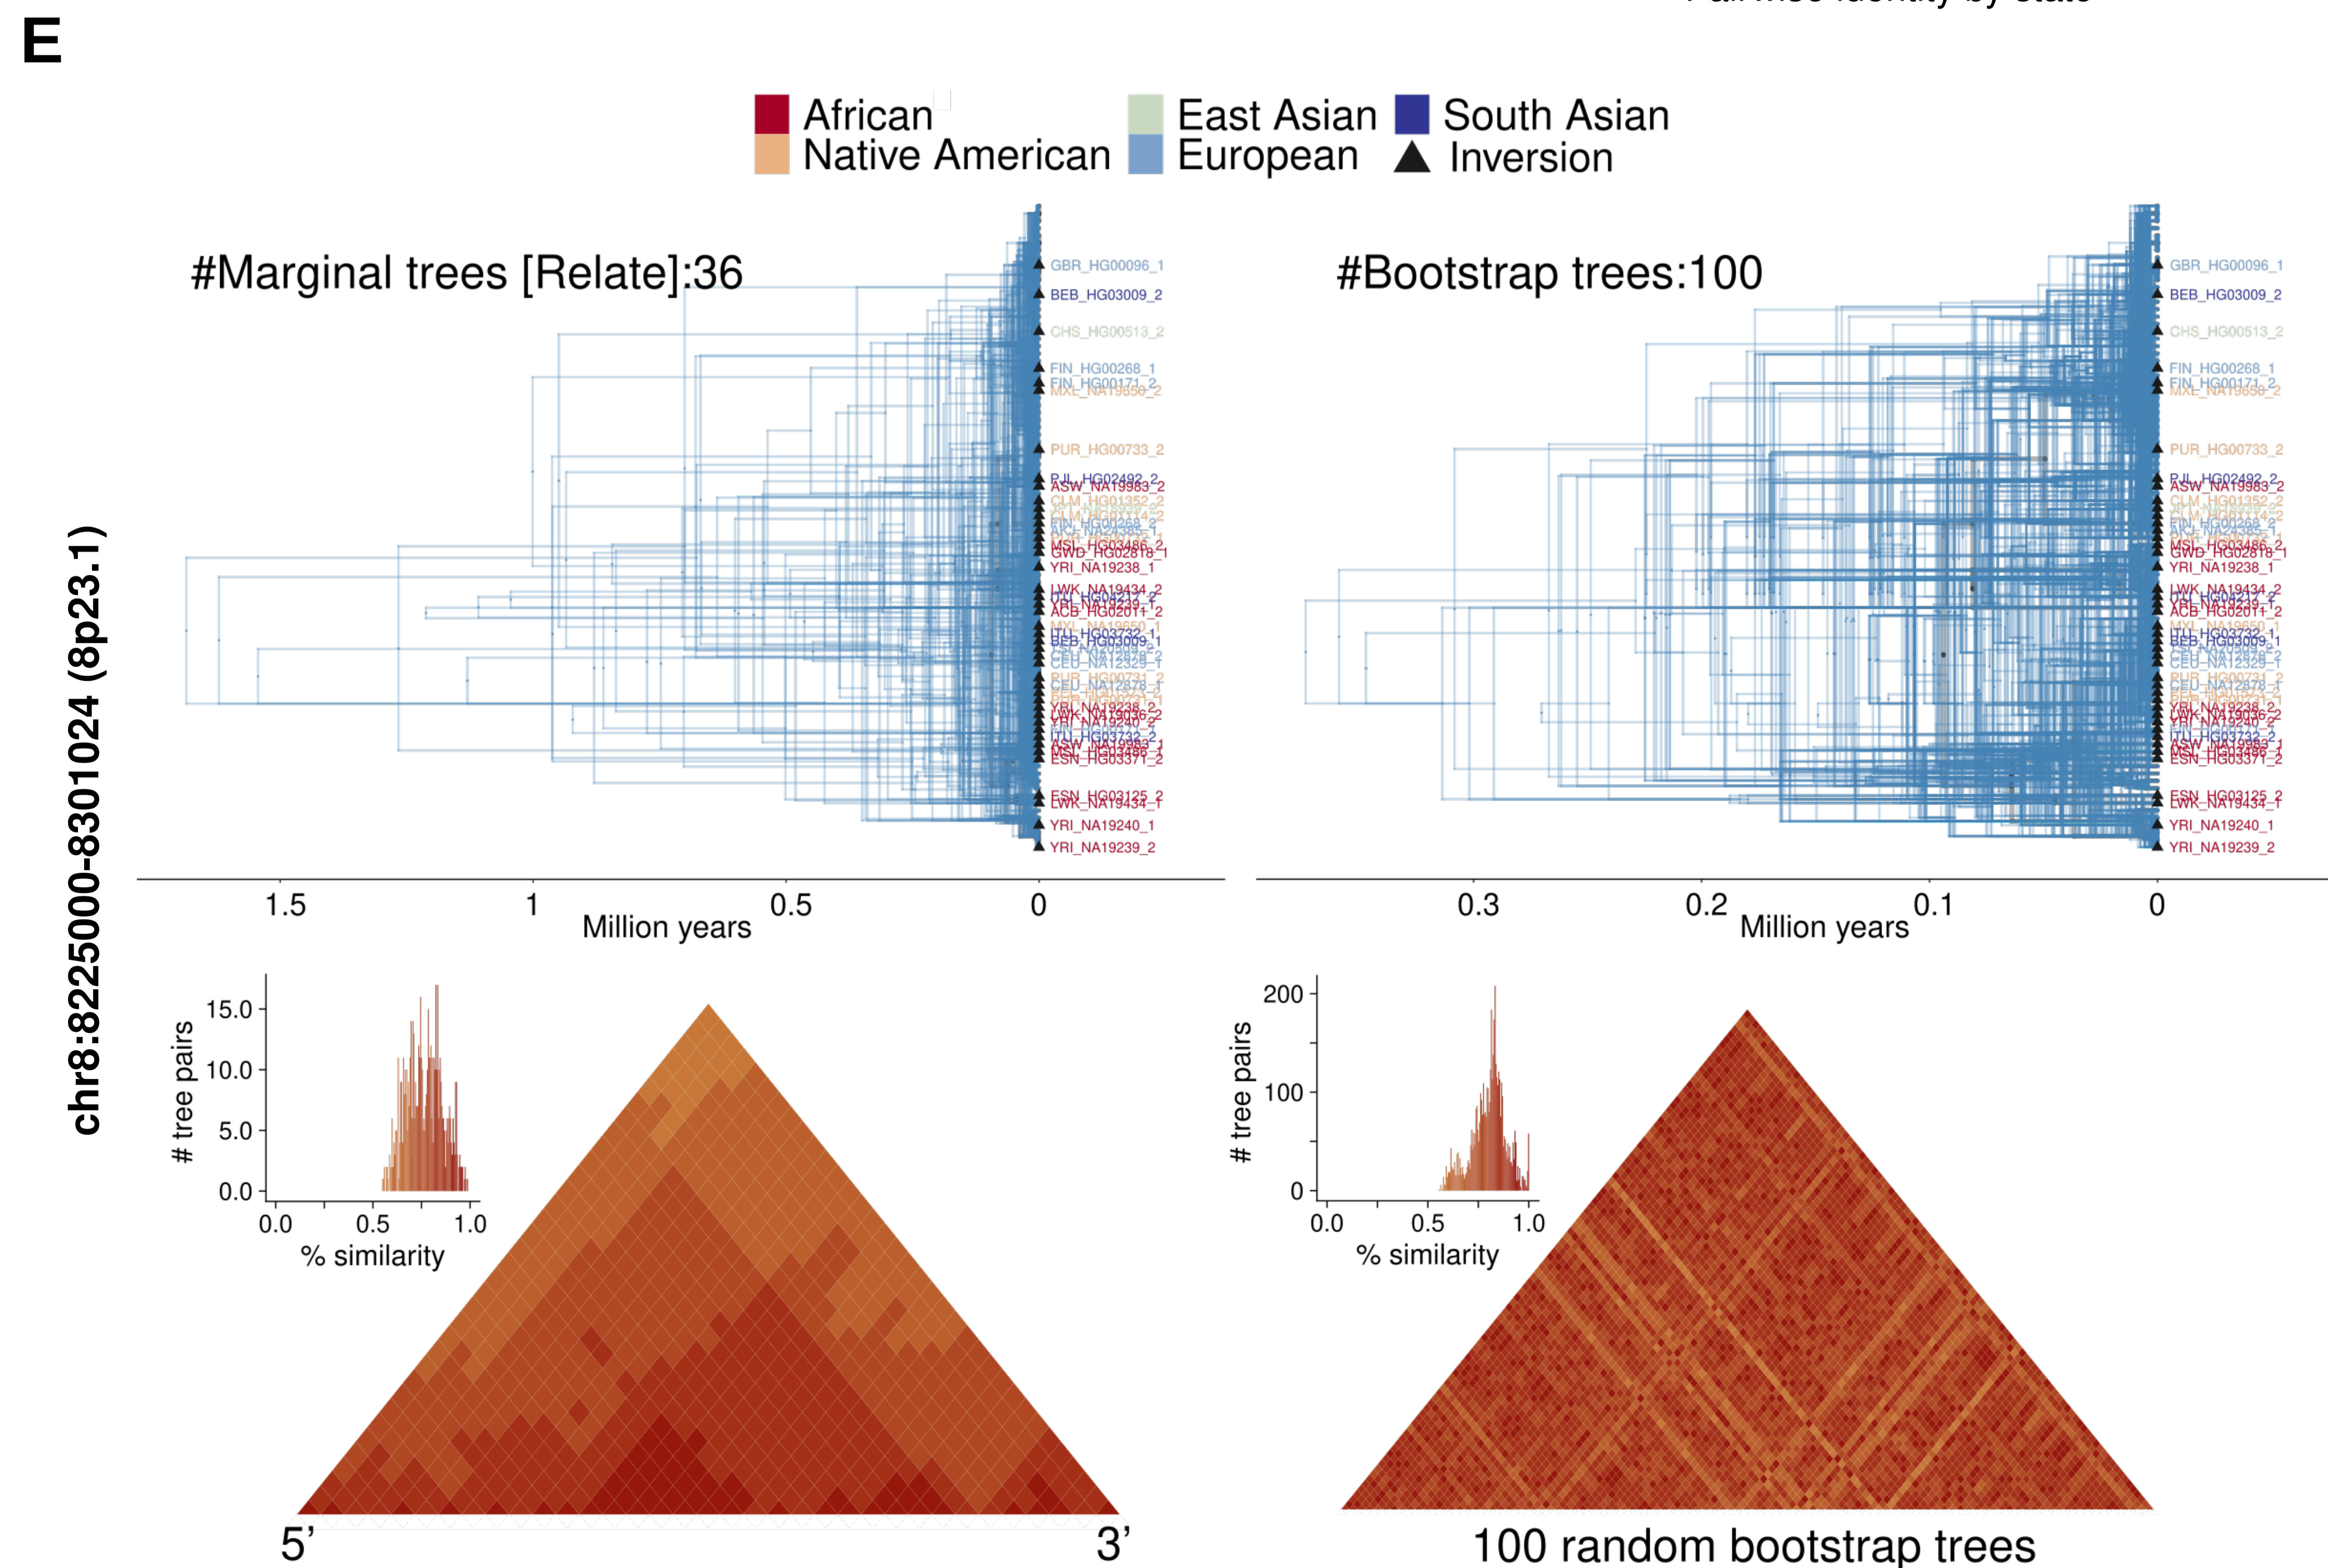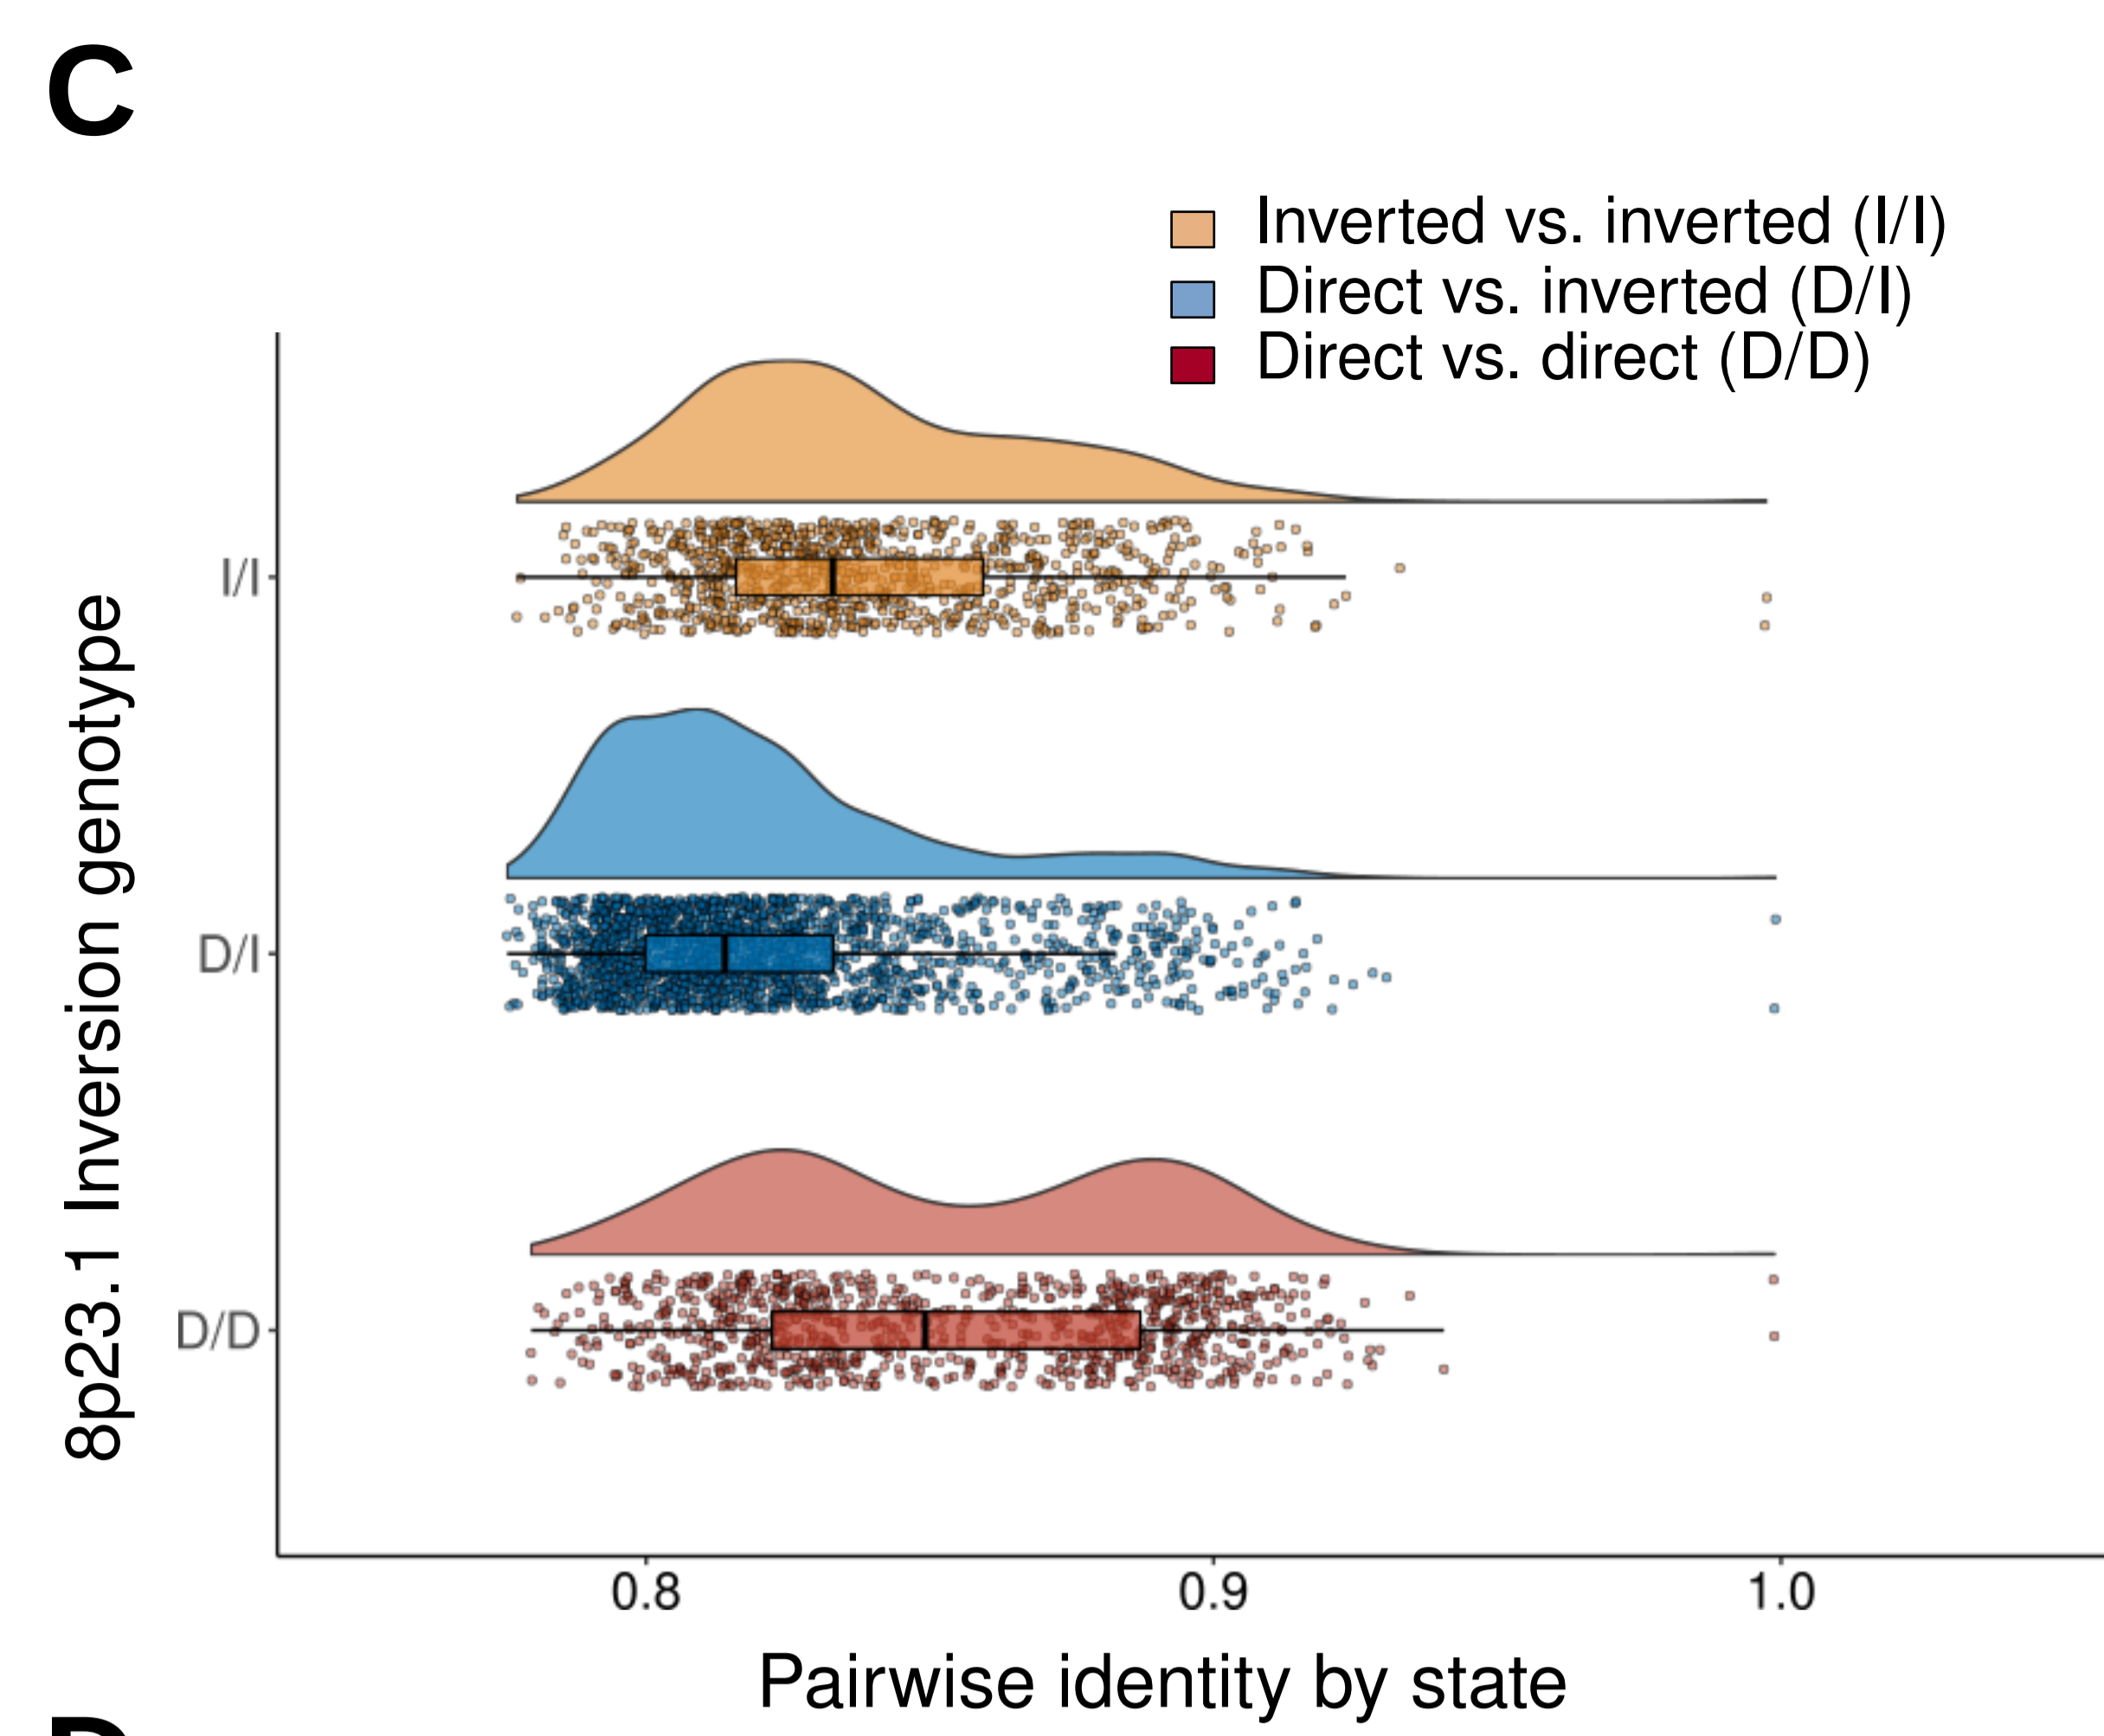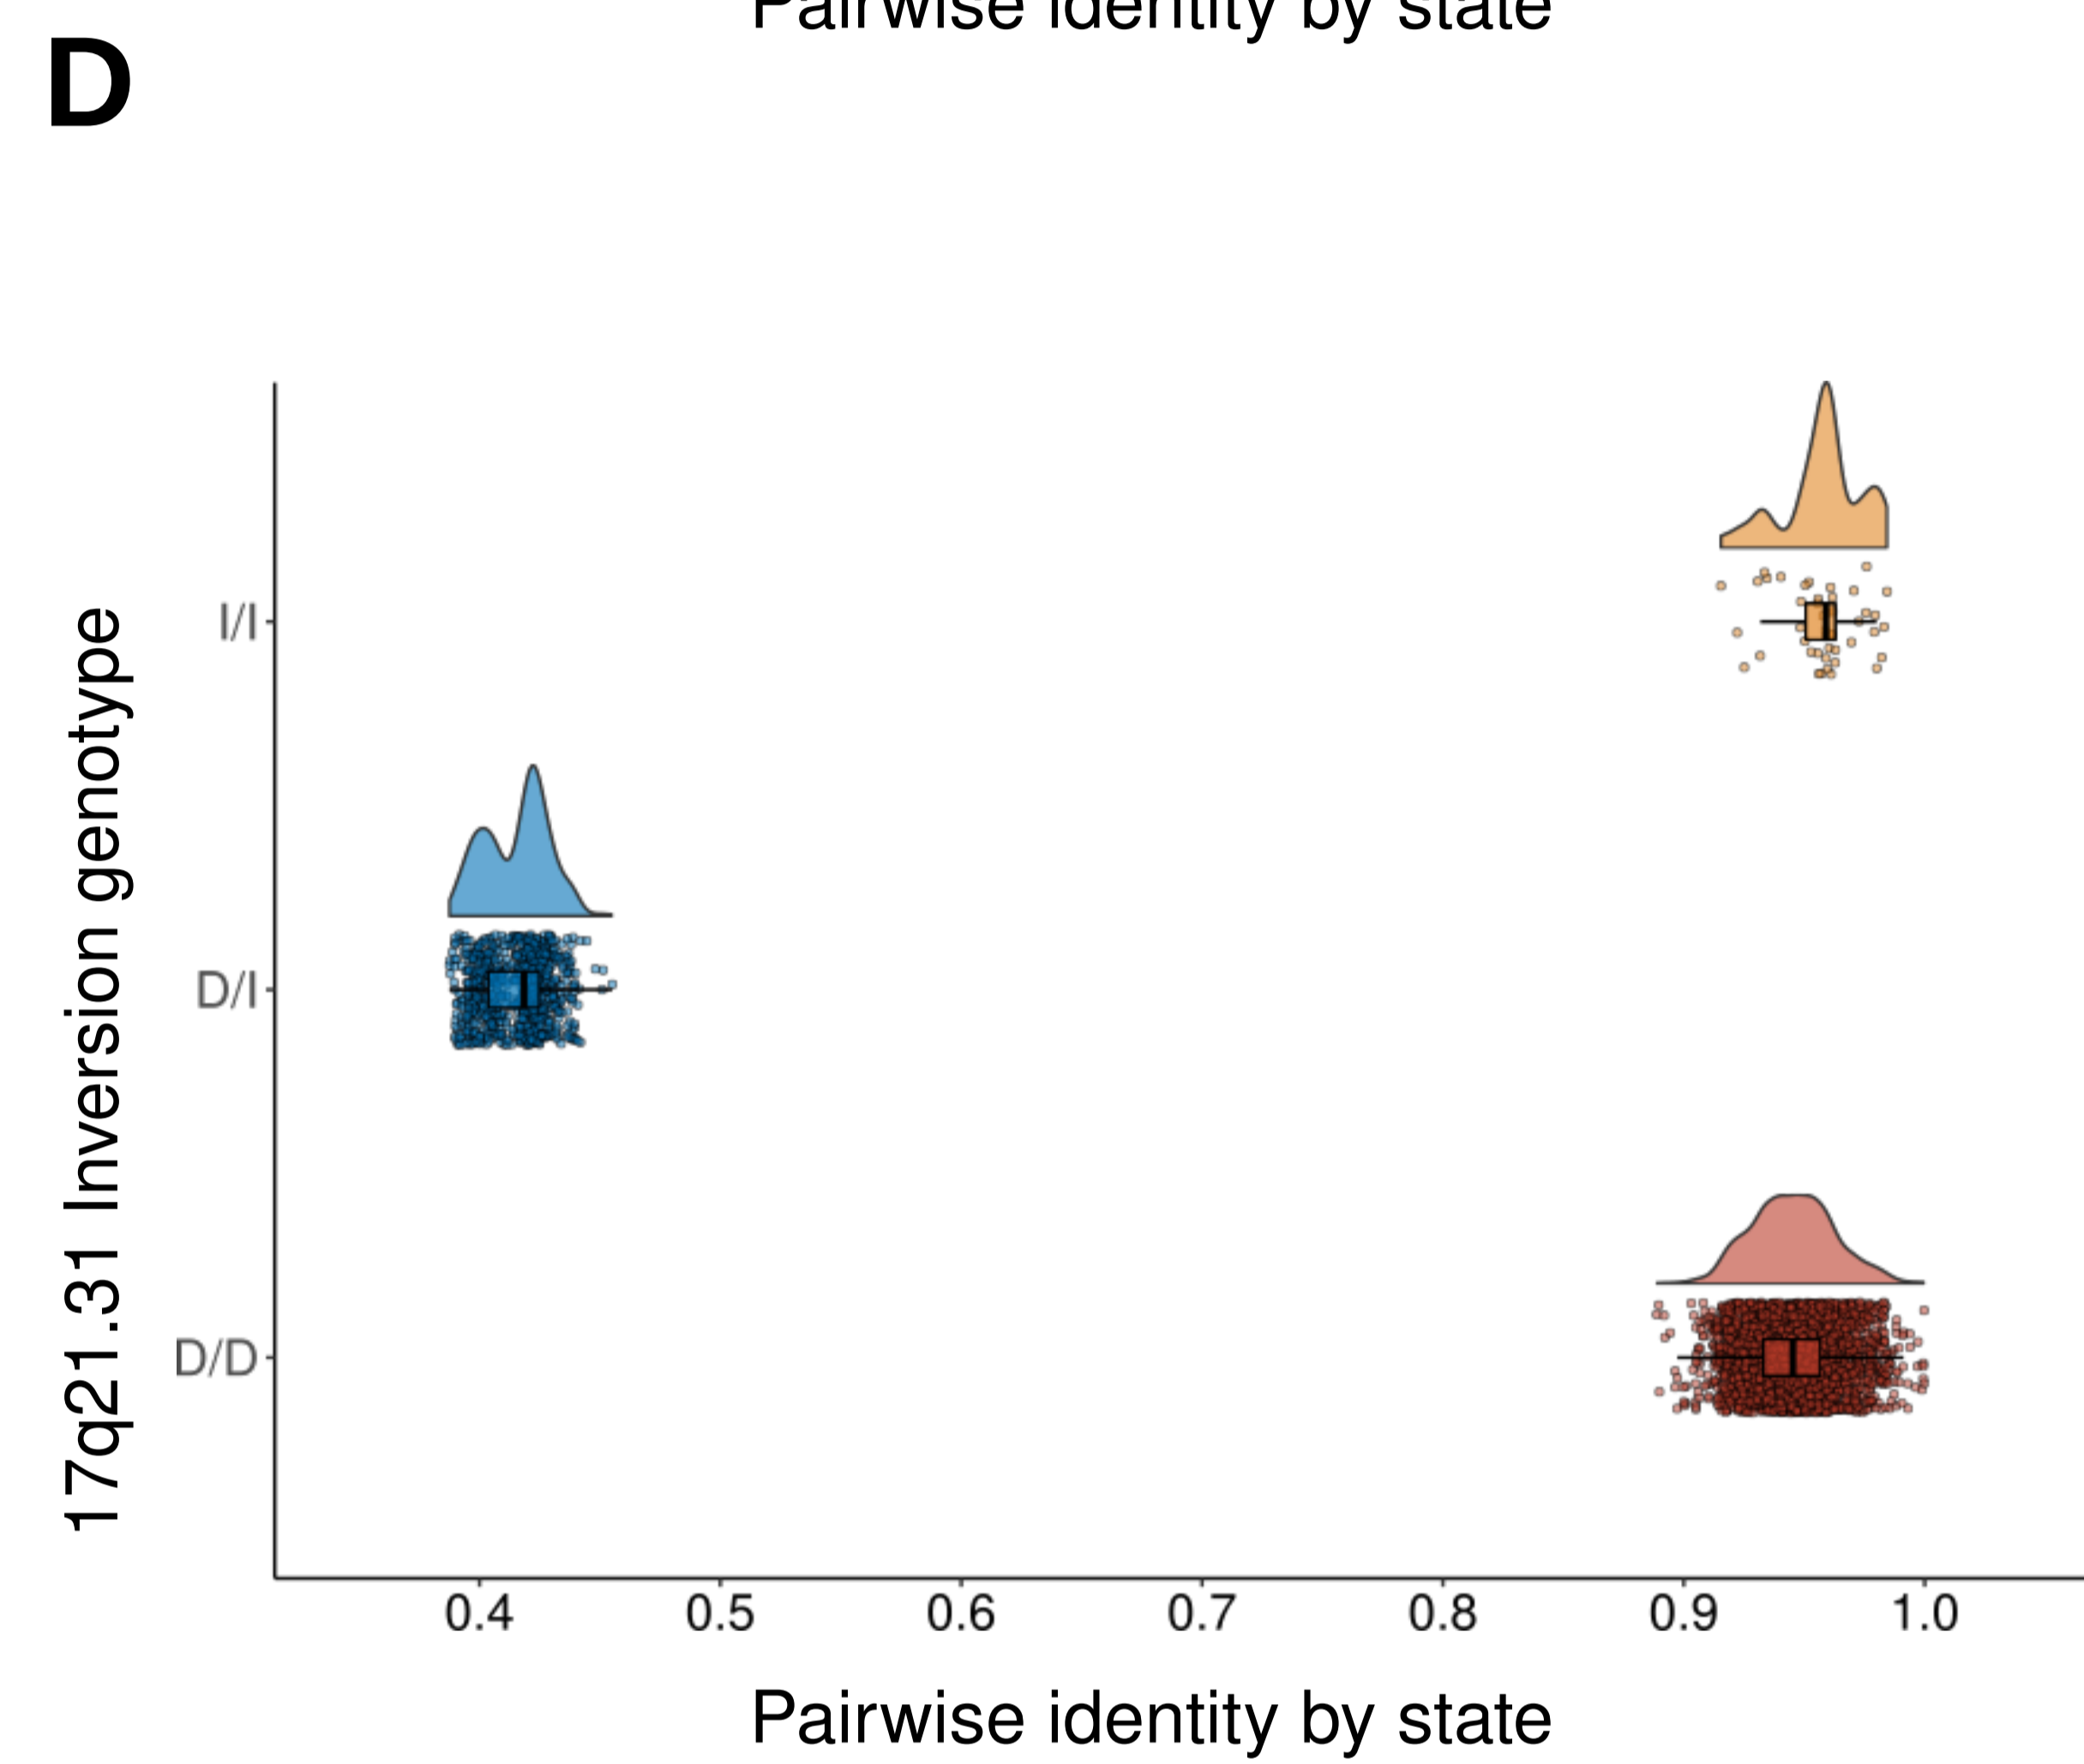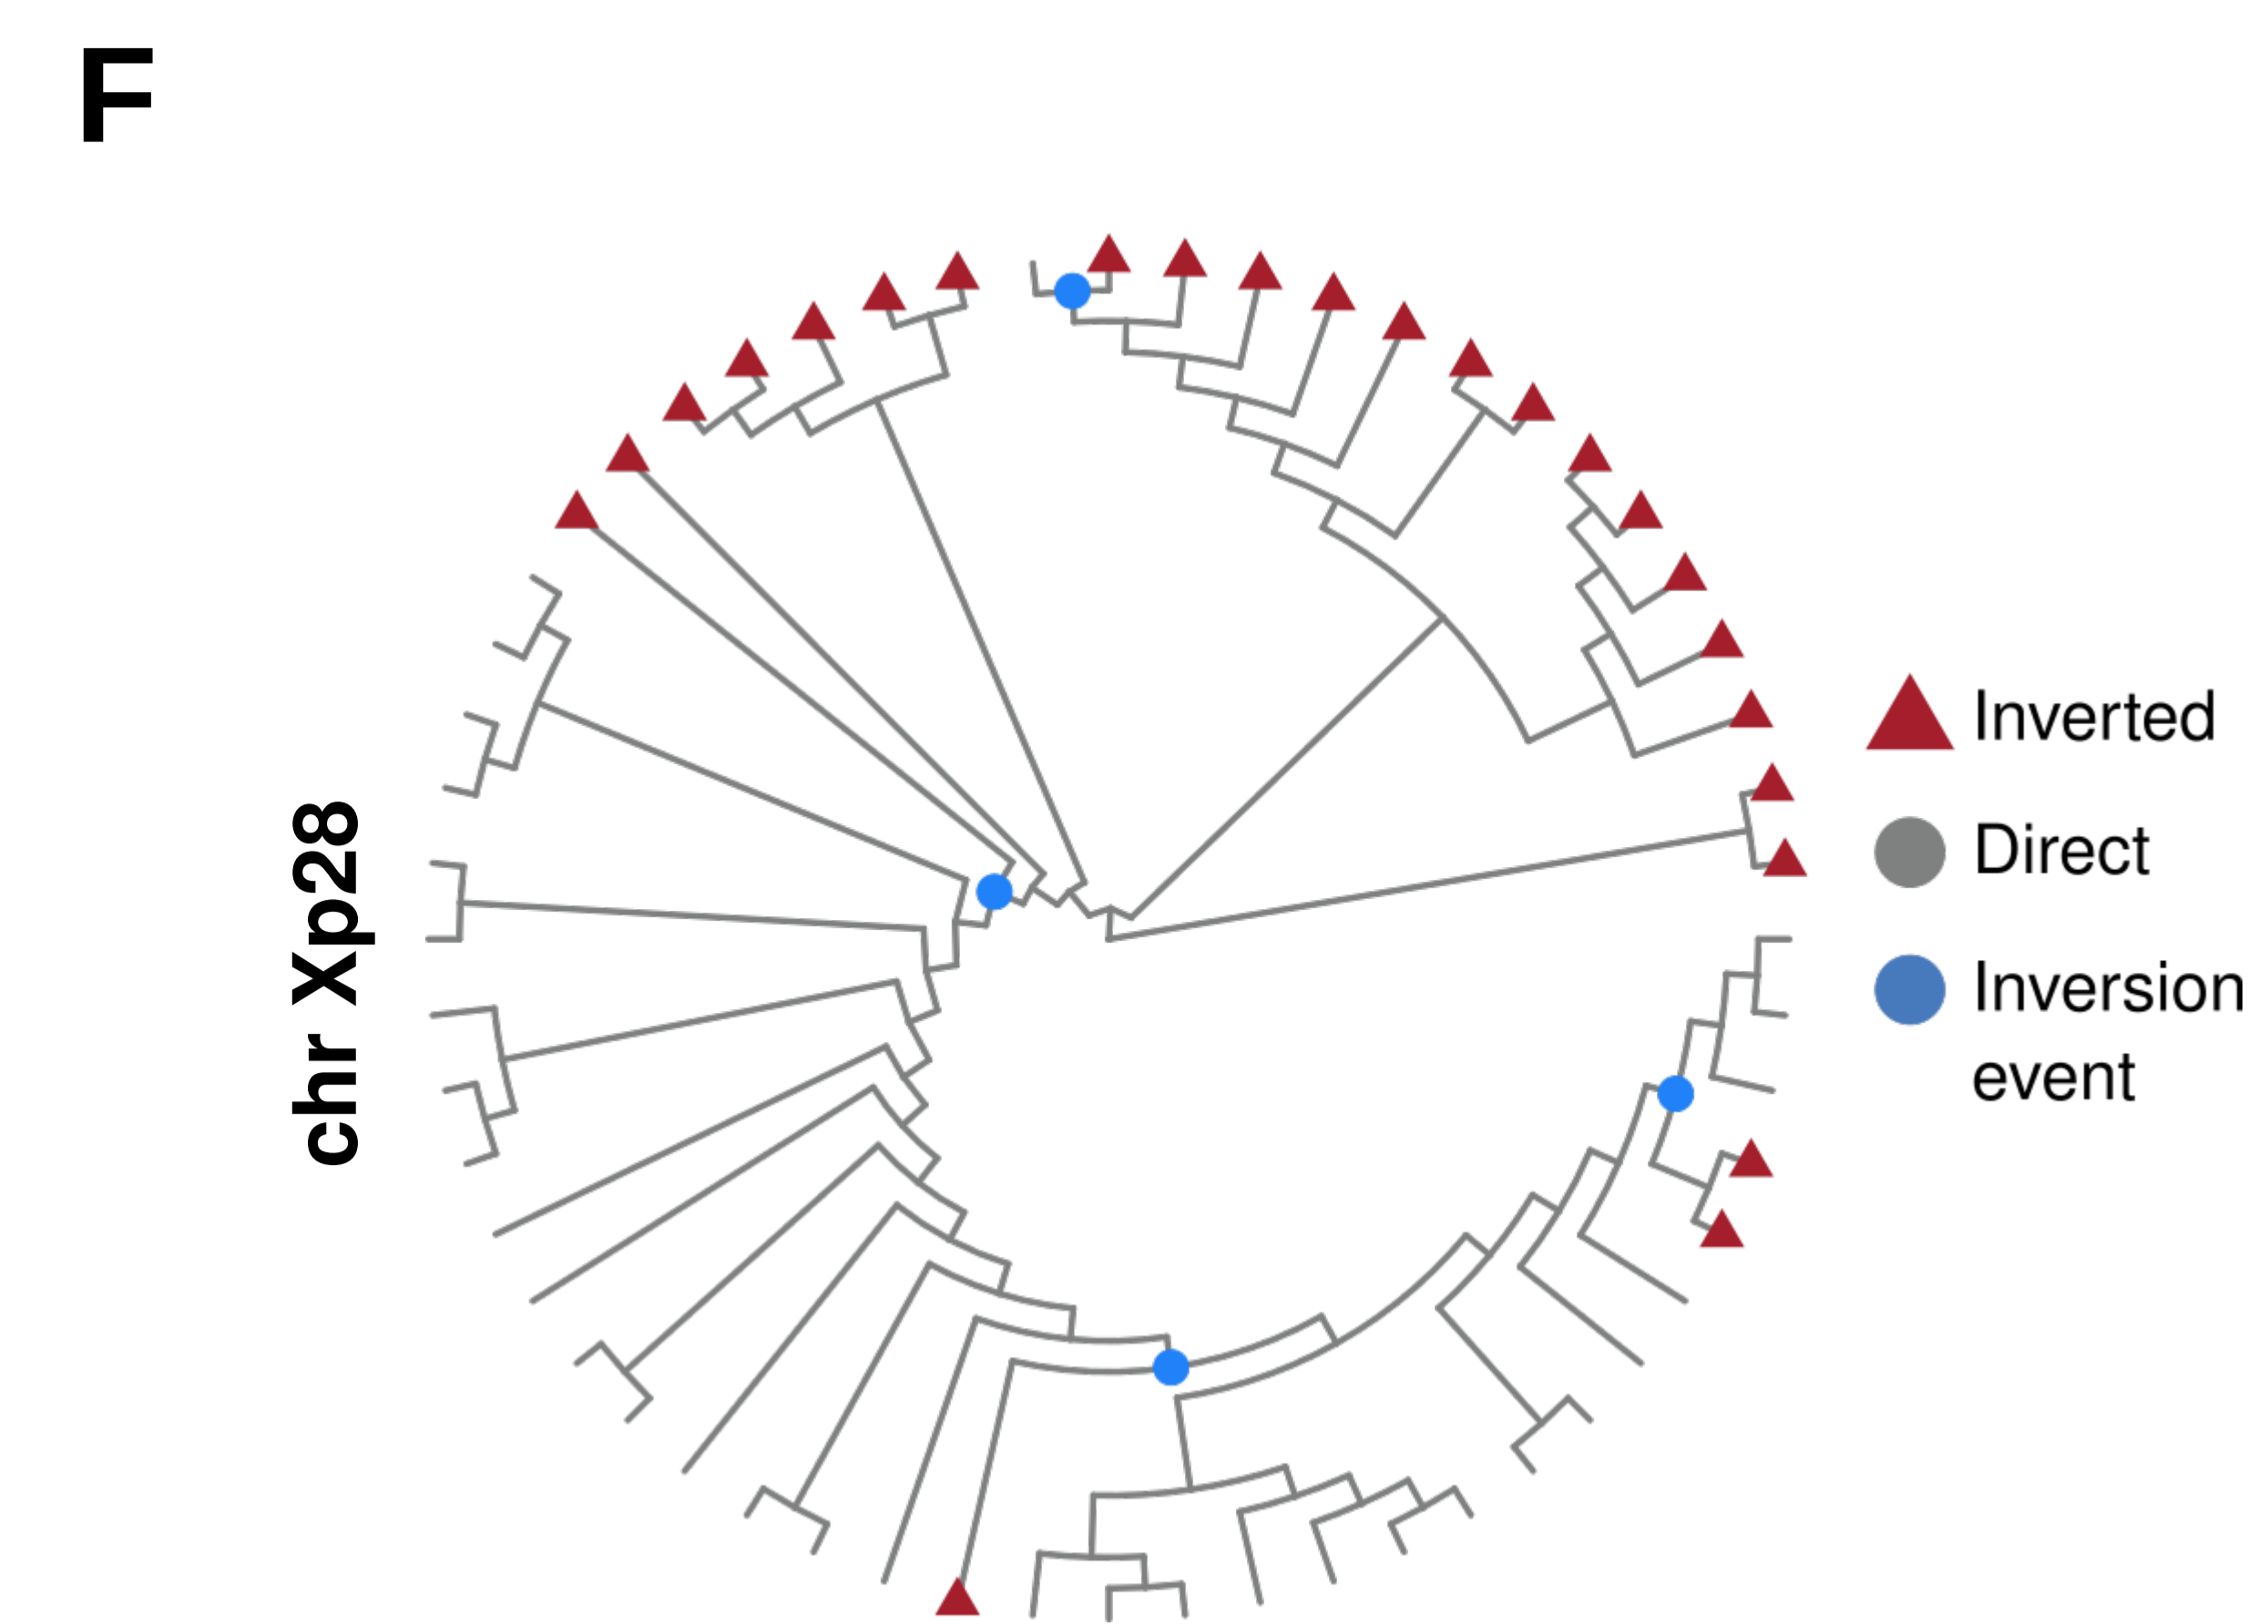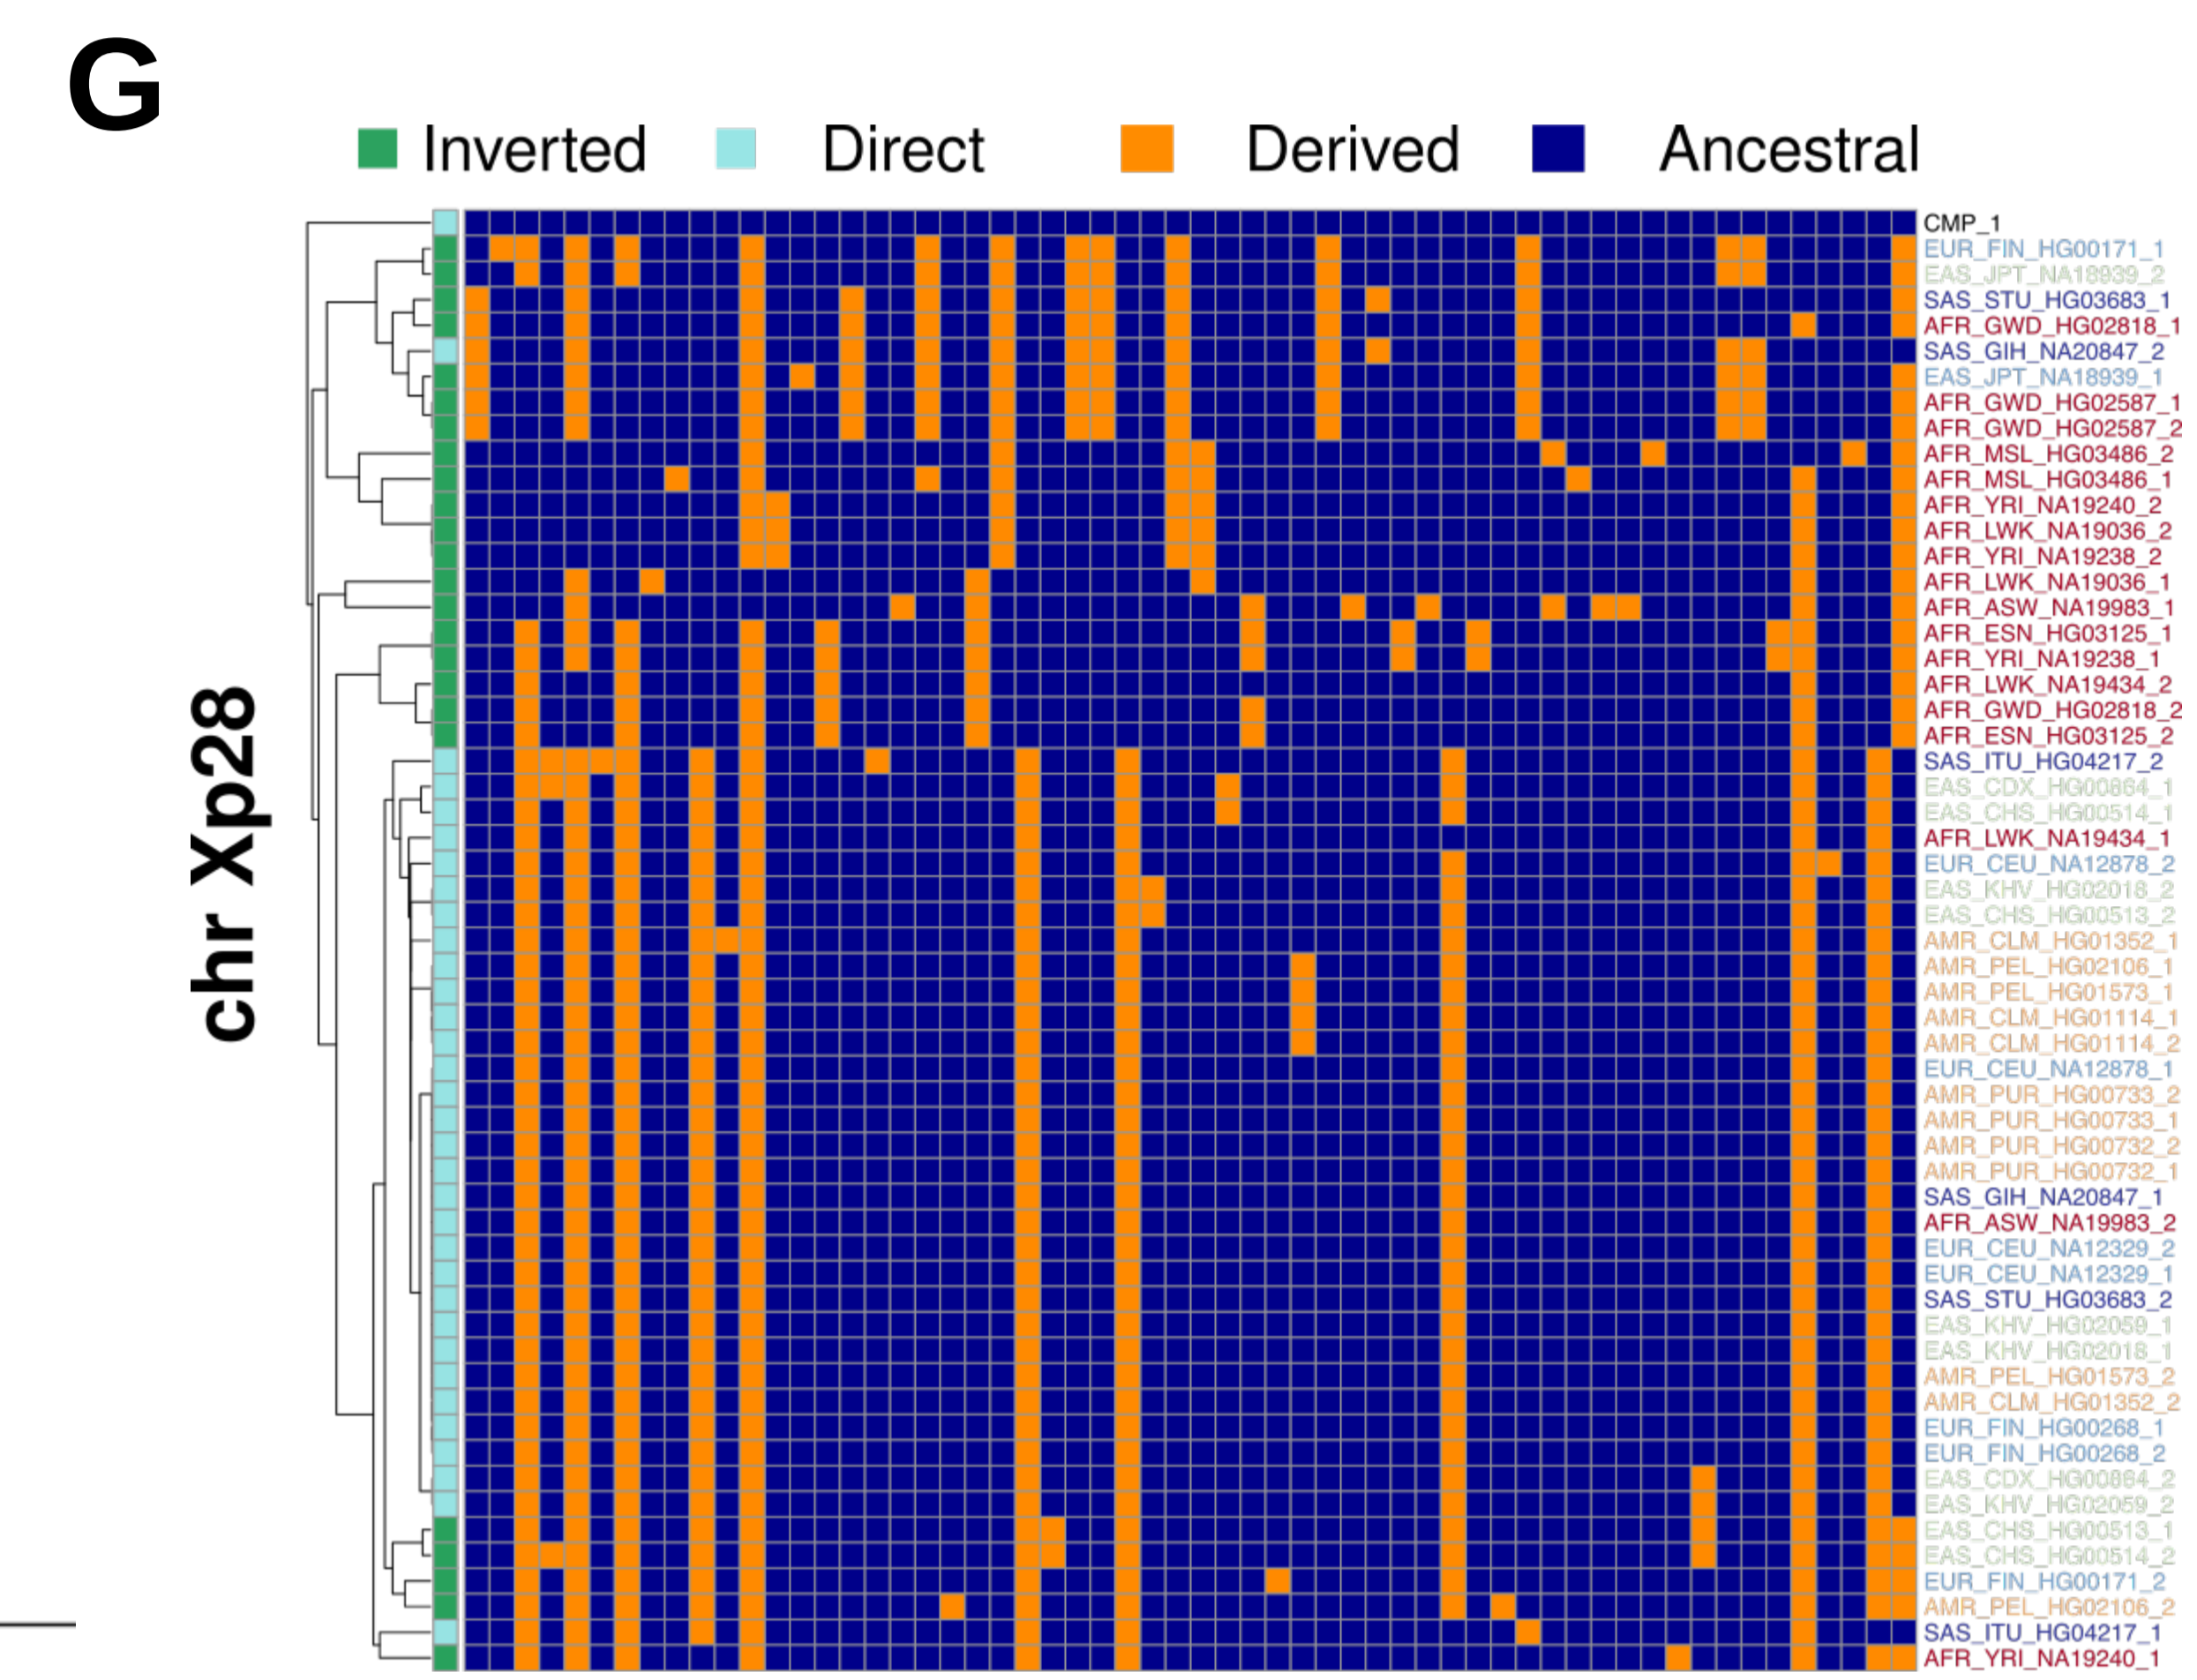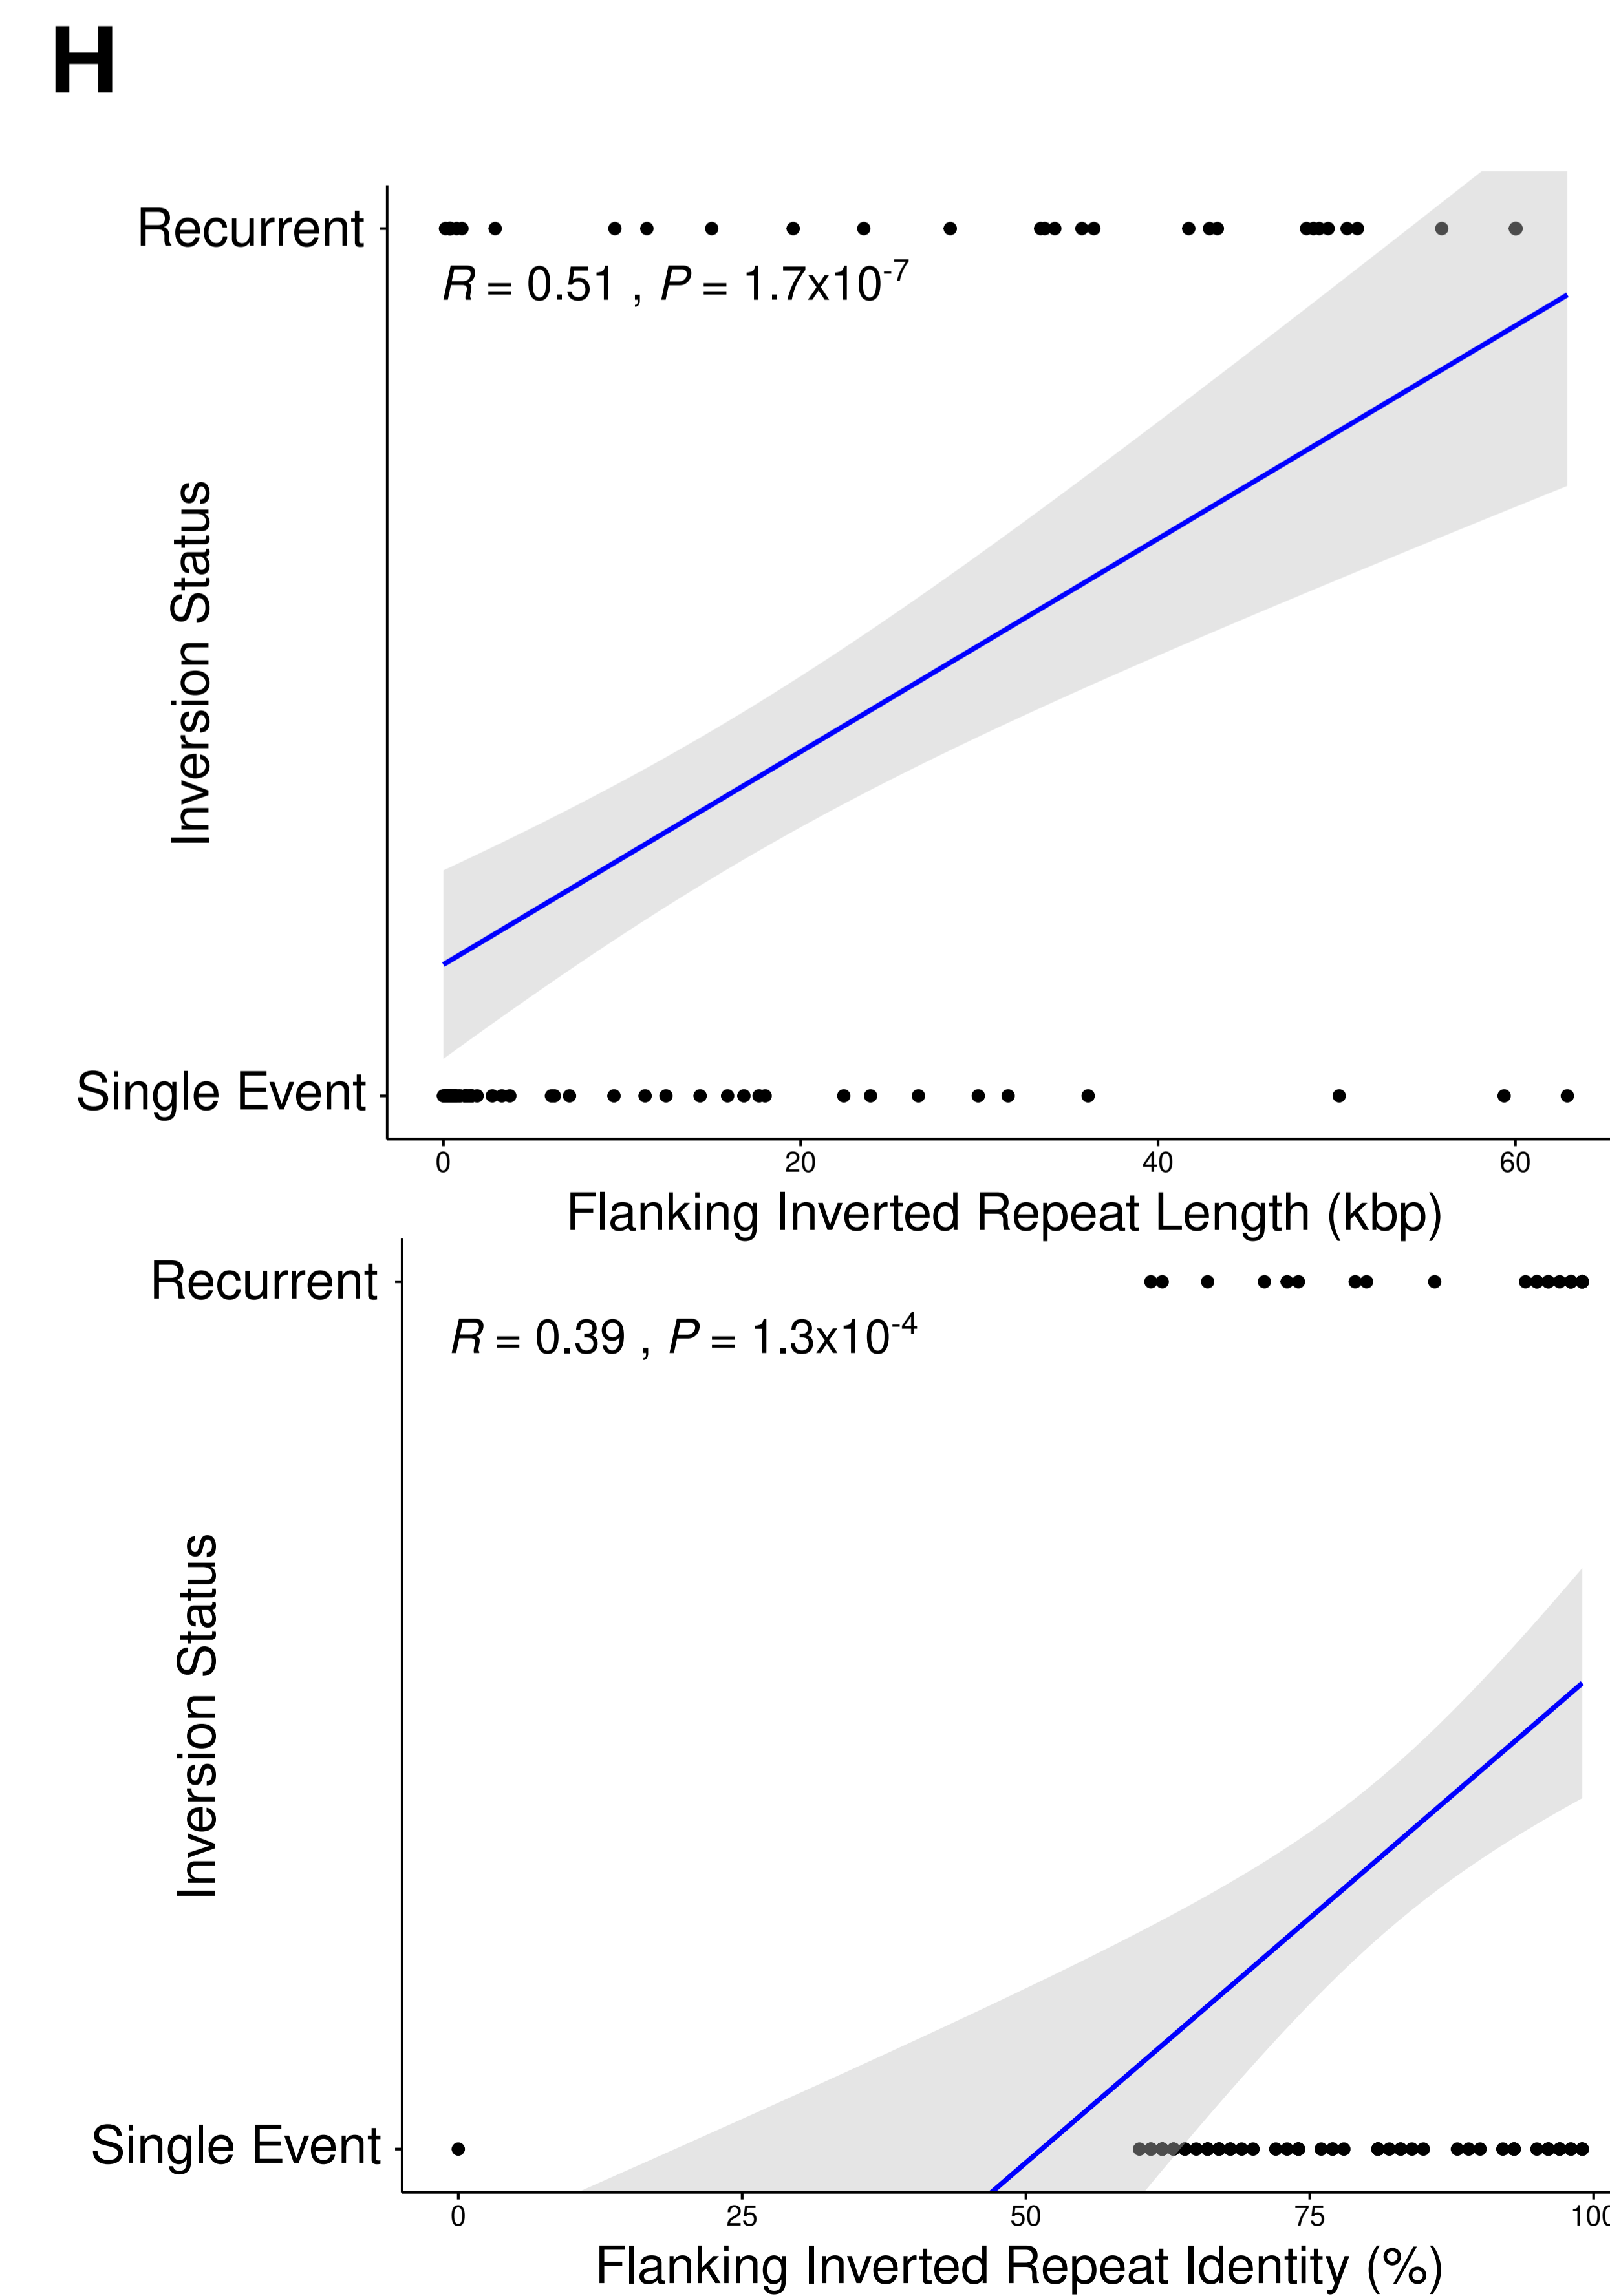

Supplement: NIHMS1803457-supplement-7.pdf [file NIHMS1803457-supplement-7.pdf]
